# Supplementary material for: Large-Scale Evolutionary Analysis of Genes and Supergene Clusters from Terpenoid Modular Pathways Provides Insights into Metabolic Diversification in Flowering Plants
Source: PLoS One. 2015 Jun 5;10(6):e0128808. doi: 10.1371/journal.pone.0128808 (PMC4457800; doi:10.1371/journal.pone.0128808)
Supplement: S2 Table — (XLS) [file pone.0128808.s002.xls]

## Sheet: Supplementary_Table_2_revised
Supplementary Table 2 | Cross-referencing of 1, 904 target genes among 17 genomes to a specific subset of genes acting in the terpenoid biosynthetic module
Species	Gene Name	Member of Tandem Array?	Ohnolog duplciate?	Involved in	DXS-like?
Z. mays	AC194970.5_FGT001	No	#N/A	(specialized) Prenyltransferase	No
Z. mays	AC199782.5_FGT002	No	#N/A	(specialized) Mevalonic acid pathway	No
Z. mays	AC205502.4_FGT004	No	#N/A	core TPS	No
Z. mays	AC209374.4_FGT002	No	#N/A	(specialized) MEP pathway	No
Z. mays	AC214360.3_FGT001	No	#N/A	core TPS	No
Z. mays	AC217050.4_FGT007	No	#N/A	core TPS	No
Z. mays	AC218998.2_FGT011	No	#N/A	core TPS	No
A. thaliana (extended set)	AT2G17370	No	#N/A	(specialized) Mevalonic acid pathway	No
A. thaliana (extended set)	AT1G31950	Yes	#N/A	core TPS	No
A. thaliana (extended set)	AT1G33750	Yes	#N/A	core TPS	No
A. thaliana (extended set)	AT1G48800	Yes	#N/A	core TPS	No
A. thaliana (extended set)	AT1G48820	Yes	#N/A	core TPS tandem (terpenpoid volatiles)	No
A. thaliana (extended set)	AT1G49530	Yes	#N/A	(specialized) Prenyltransferase	No
A. thaliana (extended set)	AT1G61120	Yes	#N/A	core TPS	No
A. thaliana (extended set)	AT1G61680	Yes	#N/A	core TPS	No
A. thaliana (extended set)	AT1G62730	No	#N/A	] triterpene (squalene)	No
A. thaliana (extended set)	AT1G63970	No	#N/A	(specialized) MEP pathway	No
A. thaliana (extended set)	AT1G66020	Yes	#N/A	core TPS	No
A. thaliana (extended set)	AT1G66960	Yes	#N/A	] triterpene (lupeol)	No
A. thaliana (extended set)	AT1G70080	Yes	#N/A	core TPS	No
A. thaliana (extended set)	AT2G38700	No	Yes	(specialized) Mevalonic acid pathway	No
A. thaliana (extended set)	AT1G78480	Yes	#N/A	] triterpene (lupeol)	No
A. thaliana (extended set)	AT1G78500	Yes	#N/A	] triterpene (camelliol)	No
A. thaliana (extended set)	AT1G78950	Yes	#N/A	] triterpene (camelliol)	No
A. thaliana (extended set)	AT1G78955	Yes	#N/A	] triterpene (camelliol)	No
A. thaliana (extended set)	AT1G78960	Yes	#N/A	] triterpene (lupeol)	No
A. thaliana (extended set)	AT1G78970	Yes	#N/A	] triterpene (lupeol)	No
A. thaliana (extended set)	AT1G79460	Yes	#N/A	core TPS	No
A. thaliana (extended set)	AT2G02500	No	#N/A	(specialized) MEP pathway	No
A. thaliana (extended set)	AT2G07050	No	#N/A	] triterpene (lanosterol)	No
A. thaliana (extended set)	AT3G54250	No	Yes	(specialized) Mevalonic acid pathway	No
A. thaliana (extended set)	AT2G18620	Yes	Yes	(specialized) Prenyltransferase	No
A. thaliana (extended set)	AT2G18640	Yes	#N/A	(specialized) Prenyltransferase	No
A. thaliana (extended set)	AT2G23230	Yes	#N/A	core TPS	No
A. thaliana (extended set)	AT2G23800	Yes	Yes	(specialized) Prenyltransferase	No
A. thaliana (extended set)	AT2G24210	Yes	#N/A	core TPS	No
A. thaliana (extended set)	AT2G26930	No	#N/A	(specialized) MEP pathway	No
A. thaliana (extended set)	AT2G34630	No	#N/A	(specialized) Prenyltransferase	No
A. thaliana (extended set)	AT2G37140	No	#N/A	] triterpene (unknown)	No
A. thaliana (extended set)	AT4G11820	No	#N/A	(specialized) Mevalonic acid pathway	No
A. thaliana (extended set)	AT3G02780	No	Yes	(specialized) IPP Isomerase	No
A. thaliana (extended set)	AT3G14490	Yes	#N/A	core TPS	No
A. thaliana (extended set)	AT3G14510	Yes	#N/A	(specialized) Prenyltransferase	No
A. thaliana (extended set)	AT3G14520	Yes	#N/A	core TPS	No
A. thaliana (extended set)	AT3G14530	Yes	#N/A	(specialized) Prenyltransferase	No
A. thaliana (extended set)	AT3G14540	Yes	#N/A	core TPS	No
A. thaliana (extended set)	AT3G14550	Yes	#N/A	(specialized) Prenyltransferase	No
A. thaliana (extended set)	AT3G20160	No	#N/A	(specialized) Prenyltransferase	No
A. thaliana (extended set)	AT3G21500	No	Yes	(specialized) MEP pathway	Yes
A. thaliana (extended set)	AT3G25810	Yes	#N/A	core TPS	No
A. thaliana (extended set)	AT3G25820	Yes	#N/A	core TPS	No
A. thaliana (extended set)	AT3G25830	Yes	#N/A	core TPS	No
A. thaliana (extended set)	AT3G29110	Yes	#N/A	core TPS	No
A. thaliana (extended set)	AT3G29190	Yes	#N/A	core TPS	No
A. thaliana (extended set)	AT3G29255	Yes	#N/A	] triterpene (unknown)	No
A. thaliana (extended set)	AT3G29410	Yes	#N/A	core TPS	No
A. thaliana (extended set)	AT3G29430	Yes	#N/A	(specialized) Prenyltransferase	No
A. thaliana (extended set)	AT3G32030	Yes	#N/A	core TPS	No
A. thaliana (extended set)	AT3G32040	Yes	#N/A	(specialized) Prenyltransferase	No
A. thaliana (extended set)	AT3G45130	No	#N/A	] triterpene (lanosterol)	No
A. thaliana (extended set)	AT5G27450	No	#N/A	(specialized) Mevalonic acid pathway	No
A. thaliana (extended set)	AT4G02780	No	#N/A	core TPS	No
A. thaliana (extended set)	AT1G31910	Yes	#N/A	(specialized) Mevalonic acid pathway	No
A. thaliana (extended set)	AT4G13280	Yes	#N/A	core TPS	No
A. thaliana (extended set)	AT4G13300	Yes	#N/A	core TPS	No
A. thaliana (extended set)	AT4G15340	Yes	#N/A	] triterpene (unknown)	No
A. thaliana (extended set)	AT4G15370	Yes	#N/A	] triterpene (baruol)	No
A. thaliana (extended set)	AT4G15560	Yes	Yes	] triterpene (baruol)	Yes
A. thaliana (extended set)	AT4G15870	Yes	#N/A	core TPS	No
A. thaliana (extended set)	AT4G16730	Yes	#N/A	core TPS	No
A. thaliana (extended set)	AT4G16740	Yes	#N/A	core TPS	No
A. thaliana (extended set)	AT4G17190	Yes	Yes	(specialized) Prenyltransferase	No
A. thaliana (extended set)	AT4G20200	Yes	#N/A	core TPS	No
A. thaliana (extended set)	AT4G20210	Yes	Yes	core TPS	No
A. thaliana (extended set)	AT4G20230	Yes	#N/A	core TPS	No
A. thaliana (extended set)	AT4G34350	No	#N/A	(specialized) MEP pathway	No
A. thaliana (extended set)	AT4G36810	No	Yes	(specialized) Prenyltransferase	No
A. thaliana (extended set)	AT4G38460	No	#N/A	(specialized) Prenyltransferase	No
A. thaliana (extended set)	AT5G11380	No	#N/A	(specialized) MEP pathway	Yes
A. thaliana (extended set)	AT5G16440	No	Yes	(specialized) IPP Isomerase	No
A. thaliana (extended set)	AT5G23960	No	#N/A	core TPS	No
A. thaliana (extended set)	AT1G76490	Yes	#N/A	(specialized) Mevalonic acid pathway	No
A. thaliana (extended set)	AT5G36150	No	#N/A	] triterpene (unknown)	No
A. thaliana (extended set)	AT5G42600	No	#N/A	] triterpene marneral	No
A. thaliana (extended set)	AT5G44630	Yes	Yes	core TPS	No
A. thaliana (extended set)	AT5G47720	Yes	#N/A	(specialized) Mevalonic acid pathway	No
A. thaliana (extended set)	AT5G47770	Yes	Yes	(specialized) Prenyltransferase	No
A. thaliana (extended set)	AT5G48010	Yes	#N/A	] triterpene (thalianol)	No
A. thaliana (extended set)	AT5G48110	Yes	#N/A	core TPS	No
A. thaliana (extended set)	AT5G48230	Yes	#N/A	(specialized) Mevalonic acid pathway	No
A. thaliana (extended set)	AT5G60600	No	#N/A	(specialized) MEP pathway	No
A. thaliana (extended set)	AT5G62790	No	#N/A	(specialized) MEP pathway	No
B. rapa	Bra000568	No	#N/A	core TPS	No
B. rapa	Bra000727	No	Yes	core TPS	No
B. rapa	Bra000864	Yes	Yes	core TPS	No
B. rapa	Bra001063	No	Yes	(specialized) IPP Isomerase	No
B. rapa	Bra001555	Yes	#N/A	core TPS	No
B. rapa	Bra001556	Yes	Yes	(specialized) Prenyltransferase	No
B. rapa	Bra001557	Yes	#N/A	core TPS	No
B. rapa	Bra001777	No	Yes	(specialized) Prenyltransferase	No
B. rapa	Bra001832	No	Yes	(specialized) MEP pathway	Yes
B. rapa	Bra002053	No	#N/A	(specialized) Mevalonic acid pathway	No
B. rapa	Bra002165	No	#N/A	core TPS	No
B. rapa	Bra002468	No	#N/A	(specialized) MEP pathway	No
B. rapa	Bra002714	No	#N/A	core TPS	No
B. rapa	Bra002967	Yes	#N/A	core TPS	No
B. rapa	Bra002968	Yes	#N/A	core TPS	No
B. rapa	Bra003630	No	Yes	] triterpene (camelliol)	No
B. rapa	Bra005405	No	Yes	(specialized) Prenyltransferase	No
B. rapa	Bra006354	No	Yes	(specialized) IPP Isomerase	No
B. rapa	Bra007059	No	Yes	(specialized) Mevalonic acid pathway	No
B. rapa	Bra008261	No	Yes	(specialized) Mevalonic acid pathway	No
B. rapa	Bra008967	No	#N/A	(specialized) MEP pathway	Yes
B. rapa	Bra009717	No	#N/A	core TPS	No
B. rapa	Bra010123	No	Yes	(specialized) MEP pathway	No
B. rapa	Bra010576	No	Yes	(specialized) Prenyltransferase	No
B. rapa	Bra011522	No	Yes	(specialized) MEP pathway	No
B. rapa	Bra011709	No	Yes	(specialized) Prenyltransferase	No
B. rapa	Bra011898	No	#N/A	(specialized) Prenyltransferase	No
B. rapa	Bra012040	No	#N/A	(specialized) MEP pathway	No
B. rapa	Bra012513	Yes	Yes	core TPS	No
B. rapa	Bra012515	Yes	#N/A	core TPS	No
B. rapa	Bra012779	No	Yes	(specialized) MEP pathway	Yes
B. rapa	Bra012955	No	#N/A	core TPS	No
B. rapa	Bra013167	Yes	Yes	] triterpene (cycloartenol)	No
B. rapa	Bra014828	No	Yes	(specialized) Mevalonic acid pathway	No
B. rapa	Bra014870	No	#N/A	(specialized) Mevalonic acid pathway	No
B. rapa	Bra014952	No	#N/A	] triterpene (cycloartenol)	No
B. rapa	Bra015739	No	Yes	(specialized) Mevalonic acid pathway	No
B. rapa	Bra017469	No	Yes	(specialized) Mevalonic acid pathway	No
B. rapa	Bra017785	No	Yes	(specialized) Prenyltransferase	No
B. rapa	Bra020589	No	Yes	(specialized) Mevalonic acid pathway	No
B. rapa	Bra020710	No	Yes	(specialized) Mevalonic acid pathway	No
B. rapa	Bra020921	Yes	Yes	core TPS	No
B. rapa	Bra020922	Yes	#N/A	core TPS	No
B. rapa	Bra020953	No	Yes	core TPS	No
B. rapa	Bra021082	No	#N/A	core TPS	No
B. rapa	Bra021411	No	Yes	(specialized) IPP Isomerase	No
B. rapa	Bra021560	Yes	#N/A	core TPS	No
B. rapa	Bra021562	Yes	Yes	(specialized) Prenyltransferase	No
B. rapa	Bra021563	Yes	#N/A	core TPS	No
B. rapa	Bra021564	Yes	Yes	core TPS	No
B. rapa	Bra021565	Yes	#N/A	(specialized) Prenyltransferase	No
B. rapa	Bra021566	Yes	#N/A	core TPS	No
B. rapa	Bra022152	Yes	Yes	(specialized) Mevalonic acid pathway	No
B. rapa	Bra022156	Yes	Yes	(specialized) Prenyltransferase	No
B. rapa	Bra022982	No	Yes	(specialized) Prenyltransferase	No
B. rapa	Bra024917	No	Yes	(specialized) Prenyltransferase	No
B. rapa	Bra025163	Yes	#N/A	core TPS	No
B. rapa	Bra025164	Yes	#N/A	core TPS	No
B. rapa	Bra026038	No	#N/A	] triterpene (camelliol)	No
B. rapa	Bra026591	No	#N/A	(specialized) MEP pathway	No
B. rapa	Bra027023	No	#N/A	] triterpene (squalene)	No
B. rapa	Bra027079	No	#N/A	core TPS	No
B. rapa	Bra027098	Yes	#N/A	core TPS	No
B. rapa	Bra027099	Yes	#N/A	core TPS	No
B. rapa	Bra027330	Yes	Yes	(specialized) Prenyltransferase	No
B. rapa	Bra027608	Yes	#N/A	core TPS	No
B. rapa	Bra027609	Yes	Yes	core TPS	No
B. rapa	Bra027672	No	#N/A	(specialized) MEP pathway	No
B. rapa	Bra027770	No	#N/A	(specialized) MEP pathway	No
B. rapa	Bra027931	No	Yes	core TPS	No
B. rapa	Bra028094	Yes	#N/A	(specialized) Prenyltransferase	No
B. rapa	Bra028096	Yes	#N/A	(specialized) Prenyltransferase	No
B. rapa	Bra028251	No	#N/A	core TPS	No
B. rapa	Bra032140	No	Yes	(specialized) Prenyltransferase	No
B. rapa	Bra032185	No	#N/A	] triterpene (unknown)	No
B. rapa	Bra033126	No	#N/A	(specialized) Mevalonic acid pathway	No
B. rapa	Bra033495	No	Yes	(specialized) MEP pathway	Yes
B. rapa	Bra034620	No	Yes	(specialized) MEP pathway	No
B. rapa	Bra035079	No	#N/A	] triterpene (camelliol)	No
B. rapa	Bra035120	No	#N/A	core TPS	No
B. rapa	Bra035519	No	#N/A	(specialized) Mevalonic acid pathway	No
B. rapa	Bra035808	Yes	Yes	(specialized) Prenyltransferase	No
B. rapa	Bra035809	Yes	Yes	] triterpene (baruol)	No
B. rapa	Bra035810	Yes	#N/A	] triterpene (baruol)	No
B. rapa	Bra035881	No	Yes	(specialized) MEP pathway	No
B. rapa	Bra035927	No	Yes	core TPS	No
B. rapa	Bra036182	No	Yes	(specialized) Mevalonic acid pathway	No
B. rapa	Bra036239	No	#N/A	core TPS	No
B. rapa	Bra036630	No	Yes	(specialized) Mevalonic acid pathway	No
B. rapa	Bra037501	No	Yes	(specialized) Mevalonic acid pathway	No
B. rapa	Bra038504	No	#N/A	core TPS	No
B. rapa	Bra038544	No	#N/A	(specialized) Prenyltransferase	No
B. rapa	Bra038569	No	#N/A	core TPS	No
B. rapa	Bra039216	No	Yes	(specialized) Prenyltransferase	No
B. rapa	Bra039519	Yes	Yes	core TPS	No
B. rapa	Bra039929	Yes	#N/A	] triterpene (unknown)	No
B. rapa	Bra040354	No	#N/A	core TPS	No
B. rapa	Bra040582	No	#N/A	core TPS	No
B. rapa	Bra040599	No	Yes	(specialized) IPP Isomerase	No
B. rapa	Bra040920	No	#N/A	core TPS	No
C. gynandra	Cg00785	No	#N/A	(specialized) Prenyltransferase	No
C. gynandra	Cg01712	No	#N/A	(specialized) MEP pathway	No
C. gynandra	Cg02119	No	#N/A	(specialized) MEP pathway	No
C. gynandra	Cg02617	No	#N/A	core TPS	No
C. gynandra	Cg02718	No	#N/A	(specialized) Mevalonic acid pathway	No
C. gynandra	Cg03312	No	#N/A	(specialized) Prenyltransferase	No
C. gynandra	Cg03664	No	#N/A	(specialized) IPP Isomerase	No
C. gynandra	Cg04735	No	#N/A	(specialized) Prenyltransferase	No
C. gynandra	Cg05142	No	#N/A	] triterpene (baruol)	Yes
C. gynandra	Cg05714	No	#N/A	core TPS	No
C. gynandra	Cg05944	Yes	#N/A	] triterpene (camelliol)	No
C. gynandra	Cg05949	Yes	#N/A	] triterpene (camelliol)	No
C. gynandra	Cg06174	No	#N/A	(specialized) Mevalonic acid pathway	No
C. gynandra	Cg06219	No	#N/A	core TPS	No
C. gynandra	Cg06281	No	#N/A	(specialized) Prenyltransferase	No
C. gynandra	Cg06434	No	#N/A	(specialized) Mevalonic acid pathway	No
C. gynandra	Cg06929	No	#N/A	] triterpene (squalene)	No
C. gynandra	Cg06952	No	#N/A	(specialized) Mevalonic acid pathway	No
C. gynandra	Cg07605	No	#N/A	] triterpene (camelliol)	No
C. gynandra	Cg08057	Yes	#N/A	(specialized) Mevalonic acid pathway	No
C. gynandra	Cg08060	Yes	#N/A	(specialized) Mevalonic acid pathway	No
C. gynandra	Cg08239	No	#N/A	(specialized) Prenyltransferase	No
C. gynandra	Cg08629	No	#N/A	(specialized) Prenyltransferase	No
C. gynandra	Cg09361	No	#N/A	(specialized) MEP pathway	No
C. gynandra	Cg09506	No	#N/A	] triterpene (camelliol)	No
C. gynandra	Cg09863	No	#N/A	core TPS	No
C. gynandra	Cg11140	Yes	#N/A	core TPS	No
C. gynandra	Cg11149	Yes	#N/A	core TPS	No
C. gynandra	Cg11150	Yes	#N/A	core TPS	No
C. gynandra	Cg11151	Yes	#N/A	core TPS	No
C. gynandra	Cg11286	No	#N/A	(specialized) IPP Isomerase	No
C. gynandra	Cg11523	Yes	#N/A	core TPS	No
C. gynandra	Cg11524	Yes	#N/A	core TPS	No
C. gynandra	Cg11526	Yes	#N/A	(specialized) Prenyltransferase	No
C. gynandra	Cg11804	No	#N/A	core TPS	No
C. gynandra	Cg12962	Yes	#N/A	(specialized) Prenyltransferase	No
C. gynandra	Cg12963	Yes	#N/A	(specialized) Prenyltransferase	No
C. gynandra	Cg13058	No	#N/A	(specialized) Mevalonic acid pathway	No
C. gynandra	Cg13197	No	#N/A	core TPS	No
C. gynandra	Cg13700	No	#N/A	(specialized) MEP pathway	No
C. gynandra	Cg13911	No	#N/A	] triterpene (cycloartenol)	No
C. gynandra	Cg13960	No	#N/A	(specialized) Prenyltransferase	No
C. gynandra	Cg14504	No	#N/A	(specialized) Prenyltransferase	No
C. gynandra	Cg15136	Yes	#N/A	] triterpene (camelliol)	No
C. gynandra	Cg15138	Yes	#N/A	] triterpene (lupeol)	No
C. gynandra	Cg15139	Yes	#N/A	] triterpene (camelliol)	No
C. gynandra	Cg15140	Yes	#N/A	] triterpene (cycloartenol)	No
C. gynandra	Cg15633	No	#N/A	(specialized) Prenyltransferase	No
C. gynandra	Cg15934	No	#N/A	] triterpene (cycloartenol)	No
C. gynandra	Cg16432	No	#N/A	(specialized) Prenyltransferase	No
C. gynandra	Cg17740	No	#N/A	core TPS	No
C. gynandra	Cg18475	No	#N/A	(specialized) Mevalonic acid pathway	No
C. gynandra	Cg18801	No	#N/A	(specialized) Mevalonic acid pathway	No
C. gynandra	Cg18934	No	#N/A	] triterpene (cycloartenol)	No
C. gynandra	Cg19111	No	#N/A	(specialized) Prenyltransferase	No
C. gynandra	Cg19433	No	#N/A	] triterpene (cycloartenol)	No
C. gynandra	Cg19933	No	#N/A	(specialized) Mevalonic acid pathway	No
C. gynandra	Cg20253	No	#N/A	] triterpene (lanosterol)	No
C. gynandra	Cg20354	No	#N/A	(specialized) MEP pathway	No
C. gynandra	Cg20716 (fragment)	No	No	(fragment, not included)	Yes
C. gynandra	Cg20904	No	#N/A	(specialized) Mevalonic acid pathway	No
C. gynandra	Cg21699	No	#N/A	core TPS	No
C. gynandra	Cg22018	No	#N/A	(specialized) Mevalonic acid pathway	No
C. gynandra	Cg22216	No	#N/A	(specialized) MEP pathway	No
C. gynandra	Cg22858	No	#N/A	core TPS	No
C. gynandra	Cg23038	No	#N/A	(specialized) Mevalonic acid pathway	No
C. gynandra	Cg23841	No	#N/A	(specialized) Mevalonic acid pathway	No
C. gynandra	Cg24344	No	#N/A	core TPS	No
C. gynandra	Cg24511	No	#N/A	(specialized) Prenyltransferase	No
C. gynandra	Cg24653	No	#N/A	core TPS	No
C. gynandra	Cg25053	No	#N/A	(specialized) Prenyltransferase	No
C. gynandra	Cg25095	No	#N/A	(specialized) Mevalonic acid pathway	No
C. gynandra	Cg25385	No	#N/A	core TPS	No
C. gynandra	Cg25415	No	#N/A	(specialized) MEP pathway	No
C. gynandra	Cg25629	No	#N/A	(specialized) Mevalonic acid pathway	No
C. gynandra	Cg25715	No	#N/A	(specialized) MEP pathway	Yes
C. gynandra	Cg26063	No	#N/A	] triterpene (camelliol)	No
C. gynandra	Cg26123	No	#N/A	] triterpene (camelliol)	No
C. gynandra	Cg26139	No	#N/A	core TPS	No
C. gynandra	Cg26169	No	#N/A	core TPS	No
C. gynandra	Cg26244	No	#N/A	(specialized) Mevalonic acid pathway	No
C. gynandra	Cg26451	No	#N/A	(specialized) MEP pathway	No
C. gynandra	Cg26579	No	#N/A	core TPS	No
C. gynandra	Cg27063	No	#N/A	] triterpene (baruol)	Yes
C. gynandra	Cg27209	Yes	#N/A	] triterpene (baruol)	No
C. gynandra	Cg27210	Yes	#N/A	] triterpene (camelliol)	No
C. gynandra	Cg27422	No	#N/A	] triterpene (camelliol)	No
C. gynandra	Cg27615	No	#N/A	core TPS	No
C. gynandra	Cg28033	No	#N/A	(specialized) MEP pathway	Yes
C. gynandra	Cg28645	No	#N/A	(specialized) Mevalonic acid pathway	No
C. gynandra	Cg28761	No	#N/A	core TPS	No
C. gynandra	Cg28796	No	#N/A	(specialized) Prenyltransferase	No
C. gynandra	Cg28868	No	#N/A	core TPS	No
C. gynandra	Cg28993	No	#N/A	] triterpene (cycloartenol)	No
C. gynandra	Cg29153	No	#N/A	(specialized) MEP pathway	Yes
C. gynandra	Cg29364	No	#N/A	(specialized) MEP pathway	Yes
C. gynandra	Cg29792	No	#N/A	(specialized) Mevalonic acid pathway	No
E. grandis	Eucgr.A00902.1	No	#N/A	] triterpene (camelliol)	No
E. grandis	Eucgr.A01783.1	No	#N/A	(specialized) IPP Isomerase	No
E. grandis	Eucgr.A02035.1	No	#N/A	] triterpene (camelliol)	No
E. grandis	Eucgr.B00307.1	Yes	#N/A	] triterpene (lupeol)	No
E. grandis	Eucgr.B00308.1	Yes	#N/A	] triterpene (camelliol)	No
E. grandis	Eucgr.B00316.1	Yes	#N/A	(specialized) MEP pathway	No
E. grandis	Eucgr.B00318.1	Yes	#N/A	] triterpene (camelliol)	No
E. grandis	Eucgr.B01314.1	Yes	#N/A	core TPS	No
E. grandis	Eucgr.B01315.1	Yes	#N/A	core TPS	No
E. grandis	Eucgr.B01942.1	No	#N/A	core TPS	No
E. grandis	Eucgr.B01993.1	No	#N/A	(specialized) Mevalonic acid pathway	No
E. grandis	Eucgr.B02495.1	No	#N/A	(specialized) MEP pathway	No
E. grandis	Eucgr.C00644.1	No	#N/A	(specialized) MEP pathway	No
E. grandis	Eucgr.C01793.1	No	#N/A	(specialized) MEP pathway	Yes
E. grandis	Eucgr.C02165.1	Yes	#N/A	] triterpene (cycloartenol)	No
E. grandis	Eucgr.C02167.1	Yes	#N/A	] triterpene (cycloartenol)	No
E. grandis	Eucgr.C02467.1	Yes	#N/A	core TPS	No
E. grandis	Eucgr.C02474.1	Yes	Yes	core TPS	No
E. grandis	Eucgr.C02554.1	No	Yes	core TPS	No
E. grandis	Eucgr.C04198.1	No	#N/A	core TPS	No
E. grandis	Eucgr.D00666.1	Yes	#N/A	core TPS	No
E. grandis	Eucgr.D00668.1	Yes	#N/A	core TPS	No
E. grandis	Eucgr.D00671.1	Yes	#N/A	core TPS	No
E. grandis	Eucgr.D00677.1	Yes	#N/A	core TPS	No
E. grandis	Eucgr.D00678.1	Yes	#N/A	core TPS	No
E. grandis	Eucgr.D00679.1	Yes	#N/A	core TPS	No
E. grandis	Eucgr.D00680.1	Yes	#N/A	core TPS	No
E. grandis	Eucgr.D00859.1	Yes	#N/A	core TPS	No
E. grandis	Eucgr.D00861.1	Yes	#N/A	core TPS	No
E. grandis	Eucgr.D00862.1	Yes	#N/A	core TPS	No
E. grandis	Eucgr.D00863.1	Yes	#N/A	core TPS	No
E. grandis	Eucgr.D00864.1	Yes	#N/A	core TPS	No
E. grandis	Eucgr.D00865.1	Yes	#N/A	core TPS	No
E. grandis	Eucgr.D00868.1	Yes	#N/A	core TPS	No
E. grandis	Eucgr.D00869.1	Yes	#N/A	core TPS	No
E. grandis	Eucgr.D00870.1	Yes	#N/A	core TPS	No
E. grandis	Eucgr.D00871.1	Yes	#N/A	core TPS	No
E. grandis	Eucgr.D00872.1	Yes	Yes	core TPS	No
E. grandis	Eucgr.D00874.1	Yes	#N/A	core TPS	No
E. grandis	Eucgr.D01100.1	Yes	#N/A	core TPS	No
E. grandis	Eucgr.D01103.1	Yes	#N/A	core TPS	No
E. grandis	Eucgr.D01104.1	Yes	#N/A	core TPS	No
E. grandis	Eucgr.D01105.1	Yes	#N/A	core TPS	No
E. grandis	Eucgr.D01106.1	Yes	#N/A	core TPS	No
E. grandis	Eucgr.D01114.1	Yes	#N/A	core TPS	No
E. grandis	Eucgr.D01163.1	No	#N/A	] triterpene (camelliol)	No
E. grandis	Eucgr.D01931.1	No	Yes	(specialized) Mevalonic acid pathway	No
E. grandis	Eucgr.D02459.1	Yes	#N/A	] triterpene (camelliol)	No
E. grandis	Eucgr.D02460.1	Yes	#N/A	] triterpene (camelliol)	No
E. grandis	Eucgr.E00404.1	Yes	#N/A	core TPS	No
E. grandis	Eucgr.E00414.1	Yes	Yes	core TPS	No
E. grandis	Eucgr.E00415.1	Yes	#N/A	core TPS	No
E. grandis	Eucgr.E00416.1	Yes	#N/A	core TPS	No
E. grandis	Eucgr.E00419.1	Yes	#N/A	core TPS	No
E. grandis	Eucgr.E00462.1	No	#N/A	] triterpene (squalene)	No
E. grandis	Eucgr.E00780.1	No	#N/A	(specialized) MEP pathway	No
E. grandis	Eucgr.E01312.1	No	#N/A	(specialized) Mevalonic acid pathway	No
E. grandis	Eucgr.E02449.1	Yes	#N/A	(specialized) Prenyltransferase	No
E. grandis	Eucgr.E02451.1	Yes	#N/A	(specialized) Prenyltransferase	No
E. grandis	Eucgr.E02670.1	No	#N/A	core TPS	No
E. grandis	Eucgr.E03062.1	No	#N/A	core TPS	No
E. grandis	Eucgr.E03115.1	No	Yes	core TPS	No
E. grandis	Eucgr.E03311.1	No	Yes	core TPS	No
E. grandis	Eucgr.E03562.1	Yes	#N/A	core TPS	No
E. grandis	Eucgr.E03566.1	Yes	#N/A	core TPS	No
E. grandis	Eucgr.E03569.1	Yes	#N/A	core TPS	No
E. grandis	Eucgr.E03570.1	Yes	#N/A	core TPS	No
E. grandis	Eucgr.E03571.1	Yes	#N/A	core TPS	No
E. grandis	Eucgr.E03572.1	Yes	#N/A	core TPS	No
E. grandis	Eucgr.E03574.1	Yes	#N/A	core TPS	No
E. grandis	Eucgr.E03598.1	No	#N/A	core TPS	No
E. grandis	Eucgr.E03603.1	Yes	#N/A	core TPS	No
E. grandis	Eucgr.E03605.1	Yes	#N/A	core TPS	No
E. grandis	Eucgr.E03606.1	Yes	#N/A	core TPS	No
E. grandis	Eucgr.E03610.1	Yes	#N/A	core TPS	No
E. grandis	Eucgr.E03835.1	Yes	#N/A	(specialized) Prenyltransferase	No
E. grandis	Eucgr.E03836.1	Yes	#N/A	(specialized) Prenyltransferase	No
E. grandis	Eucgr.E03995.1	No	#N/A	(specialized) Prenyltransferase	No
E. grandis	Eucgr.F00752.1	No	#N/A	(specialized) Prenyltransferase	No
E. grandis	Eucgr.F01818.1	No	Yes	(specialized) Mevalonic acid pathway	No
E. grandis	Eucgr.F02847.1	No	#N/A	(specialized) Prenyltransferase	No
E. grandis	Eucgr.F03396.1	Yes	#N/A	core TPS	No
E. grandis	Eucgr.F03398.1	Yes	#N/A	core TPS	No
E. grandis	Eucgr.F03400.1	Yes	Yes	core TPS	No
E. grandis	Eucgr.F03402.1	Yes	#N/A	core TPS	No
E. grandis	Eucgr.F03403.1	Yes	#N/A	core TPS	No
E. grandis	Eucgr.F03404.1	Yes	#N/A	core TPS	No
E. grandis	Eucgr.F03408.1	Yes	#N/A	core TPS	No
E. grandis	Eucgr.F03409.1	Yes	#N/A	core TPS	No
E. grandis	Eucgr.F03412.1	Yes	#N/A	core TPS	No
E. grandis	Eucgr.F03413.1	Yes	#N/A	core TPS	No
E. grandis	Eucgr.F03606.1	No	Yes	(specialized) Mevalonic acid pathway	No
E. grandis	Eucgr.F03855.1	No	Yes	core TPS	No
E. grandis	Eucgr.F04038.1	Yes	#N/A	] triterpene (camelliol)	No
E. grandis	Eucgr.F04039.1	Yes	#N/A	] triterpene (camelliol)	No
E. grandis	Eucgr.F04040.1	Yes	#N/A	] triterpene (camelliol)	No
E. grandis	Eucgr.F04041.1	Yes	#N/A	] triterpene (camelliol)	No
E. grandis	Eucgr.F04042.1	Yes	#N/A	] triterpene (camelliol)	No
E. grandis	Eucgr.F04043.1	Yes	#N/A	] triterpene (camelliol)	No
E. grandis	Eucgr.F04049.1	Yes	#N/A	] triterpene (camelliol)	No
E. grandis	Eucgr.F04050.1	Yes	#N/A	] triterpene (camelliol)	No
E. grandis	Eucgr.F04052.1	Yes	#N/A	] triterpene (camelliol)	No
E. grandis	Eucgr.F04220.1	Yes	#N/A	] triterpene (camelliol)	No
E. grandis	Eucgr.F04226.1	Yes	#N/A	] triterpene (camelliol)	No
E. grandis	Eucgr.G00958.1	No	#N/A	] triterpene (cycloartenol)	No
E. grandis	Eucgr.G01636.1	No	#N/A	core TPS	No
E. grandis	Eucgr.G01806.1	No	#N/A	(specialized) Prenyltransferase	No
E. grandis	Eucgr.G02693.1	No	#N/A	(specialized) Mevalonic acid pathway	No
E. grandis	Eucgr.G03303.1	Yes	#N/A	] triterpene (cycloartenol)	No
E. grandis	Eucgr.G03312.1	Yes	#N/A	] triterpene (cycloartenol)	No
E. grandis	Eucgr.G03323.1	No	#N/A	] triterpene (cycloartenol)	No
E. grandis	Eucgr.H00849.1	No	Yes	(specialized) Mevalonic acid pathway	No
E. grandis	Eucgr.H01235.1	Yes	#N/A	(specialized) Prenyltransferase	No
E. grandis	Eucgr.H01236.1	Yes	#N/A	(specialized) Prenyltransferase	No
E. grandis	Eucgr.H01393.1	No	#N/A	(specialized) IPP Isomerase	No
E. grandis	Eucgr.H01472.1	No	#N/A	core TPS	No
E. grandis	Eucgr.H03664.1	No	#N/A	(specialized) MEP pathway	Yes
E. grandis	Eucgr.H04797.1	No	#N/A	core TPS	No
E. grandis	Eucgr.H04977.1	Yes	#N/A	core TPS	No
E. grandis	Eucgr.H04978.1	Yes	#N/A	core TPS	No
E. grandis	Eucgr.H05007.1	Yes	#N/A	(specialized) Mevalonic acid pathway	No
E. grandis	Eucgr.H05008.1	Yes	#N/A	(specialized) Mevalonic acid pathway	No
E. grandis	Eucgr.H05009.1	Yes	#N/A	(specialized) Mevalonic acid pathway	No
E. grandis	Eucgr.I00566.1	No	#N/A	(specialized) MEP pathway	Yes
E. grandis	Eucgr.I01241.1	No	#N/A	(specialized) MEP pathway	No
E. grandis	Eucgr.I01544.1	No	Yes	(specialized) Mevalonic acid pathway	No
E. grandis	Eucgr.I02200.1	No	Yes	(specialized) Mevalonic acid pathway	No
E. grandis	Eucgr.I02806.1	No	#N/A	(specialized) MEP pathway	No
E. grandis	Eucgr.J00662.1	No	#N/A	(specialized) MEP pathway	No
E. grandis	Eucgr.J00991.1	No	#N/A	(specialized) Mevalonic acid pathway	No
E. grandis	Eucgr.J01451.1	Yes	#N/A	core TPS	No
E. grandis	Eucgr.J01453.1	Yes	#N/A	core TPS	No
E. grandis	Eucgr.J02561.1	No	Yes	(specialized) Mevalonic acid pathway	No
E. grandis	Eucgr.K00827.1	Yes	#N/A	core TPS	No
E. grandis	Eucgr.K00828.1	Yes	Yes	core TPS	No
E. grandis	Eucgr.K00876.1	Yes	#N/A	core TPS	No
E. grandis	Eucgr.K00877.1	Yes	#N/A	core TPS	No
E. grandis	Eucgr.K00878.1	Yes	#N/A	core TPS	No
E. grandis	Eucgr.K00879.1	Yes	Yes	core TPS	No
E. grandis	Eucgr.K00881.1	Yes	#N/A	core TPS	No
E. grandis	Eucgr.K03518.1	No	#N/A	core TPS	No
E. grandis	Eucgr.L00148.1	No	#N/A	(specialized) Mevalonic acid pathway	No
E. grandis	Eucgr.L01056.1	No	Yes	(specialized) Mevalonic acid pathway	No
E. grandis	Eucgr.L01631.1	Yes	#N/A	core TPS	No
E. grandis	Eucgr.L01637.1	Yes	#N/A	] triterpene (camelliol)	No
E. grandis	Eucgr.L01686.1	No	#N/A	core TPS	No
E. grandis	Eucgr.L01753.1	No	#N/A	core TPS	No
E. grandis	Eucgr.L02082.1	No	#N/A	core TPS	No
E. grandis	Eucgr.L02212.1	No	#N/A	core TPS	No
E. grandis	Eucgr.L02261.1	No	#N/A	core TPS	No
E. grandis	Eucgr.L02296.1	Yes	#N/A	core TPS	No
E. grandis	Eucgr.L02298.1	Yes	#N/A	core TPS	No
E. grandis	Eucgr.L02418.1	No	#N/A	core TPS	No
E. grandis	Eucgr.L02447.1	No	#N/A	core TPS	No
E. grandis	Eucgr.L02473.1	No	#N/A	core TPS	No
E. grandis	Eucgr.L02618.1	No	#N/A	core TPS	No
E. grandis	Eucgr.L02971.1	No	#N/A	core TPS	No
E. grandis	Eucgr.L03091.1	No	#N/A	core TPS	No
E. grandis	Eucgr.L03151.1	No	#N/A	core TPS	No
E. grandis	Eucgr.L03307.1	Yes	#N/A	core TPS	No
E. grandis	Eucgr.L03318.1	Yes	#N/A	(specialized) MEP pathway	No
E. grandis	Eucgr.L03326.1	No	#N/A	] triterpene (camelliol)	No
E. grandis	Eucgr.L03538.1	No	#N/A	core TPS	No
C. papaya	evm.model.supercontig_1.285	Yes	#N/A	core TPS	No
C. papaya	evm.model.supercontig_1.288	Yes	#N/A	core TPS	No
C. papaya	evm.model.supercontig_1.290	Yes	#N/A	core TPS	No
C. papaya	evm.model.supercontig_10.1	Yes	#N/A	] triterpene (camelliol)	No
C. papaya	evm.model.supercontig_10.2	Yes	#N/A	] triterpene (camelliol)	No
C. papaya	evm.model.supercontig_10.3	Yes	#N/A	] triterpene (camelliol)	No
C. papaya	evm.model.supercontig_1078.1	No	#N/A	] triterpene (camelliol)	No
C. papaya	evm.model.supercontig_1105.3	No	#N/A	(specialized) IPP Isomerase	No
C. papaya	evm.model.supercontig_116.45	No	#N/A	(specialized) Prenyltransferase	No
C. papaya	evm.model.supercontig_12.296	No	Yes	(specialized) Prenyltransferase	No
C. papaya	evm.model.supercontig_12.45	No	#N/A	core TPS	No
C. papaya	evm.model.supercontig_155.31	No	#N/A	] triterpene (camelliol)	No
C. papaya	evm.model.supercontig_157.1	No	#N/A	core TPS	No
C. papaya	evm.model.supercontig_158.18	No	#N/A	(specialized) Prenyltransferase	No
C. papaya	evm.model.supercontig_16.4	No	#N/A	(specialized) Mevalonic acid pathway	No
C. papaya	evm.model.supercontig_16.90	No	#N/A	(specialized) MEP pathway	Yes
C. papaya	evm.model.supercontig_167.27	No	#N/A	] triterpene (camelliol)	No
C. papaya	evm.model.supercontig_17.47	No	#N/A	(specialized) Prenyltransferase	No
C. papaya	evm.model.supercontig_173.2	No	#N/A	(specialized) MEP pathway	No
C. papaya	evm.model.supercontig_176.31	No	#N/A	] triterpene (cycloartenol)	No
C. papaya	evm.model.supercontig_183.13	No	#N/A	(specialized) Mevalonic acid pathway	No
C. papaya	evm.model.supercontig_19.13	Yes	#N/A	core TPS	No
C. papaya	evm.model.supercontig_19.14	Yes	#N/A	core TPS	No
C. papaya	evm.model.supercontig_19.15	Yes	#N/A	core TPS	No
C. papaya	evm.model.supercontig_1980.1	Yes	#N/A	core TPS	No
C. papaya	evm.model.supercontig_1980.2	Yes	#N/A	core TPS	No
C. papaya	evm.model.supercontig_1980.3	Yes	#N/A	core TPS	No
C. papaya	evm.model.supercontig_20.129	No	#N/A	(specialized) Prenyltransferase	No
C. papaya	evm.model.supercontig_211.35	No	#N/A	(specialized) Mevalonic acid pathway	No
C. papaya	evm.model.supercontig_216.13	No	#N/A	(specialized) MEP pathway	No
C. papaya	evm.model.supercontig_232.9	No	#N/A	(specialized) Mevalonic acid pathway	No
C. papaya	evm.model.supercontig_26.7	No	#N/A	(specialized) Mevalonic acid pathway	No
C. papaya	evm.model.supercontig_27.210	No	#N/A	(specialized) Prenyltransferase	No
C. papaya	evm.model.supercontig_27.223	No	#N/A	(specialized) Mevalonic acid pathway	No
C. papaya	evm.model.supercontig_27.87	No	#N/A	core TPS	No
C. papaya	evm.model.supercontig_29.104	No	#N/A	] triterpene (squalene)	No
C. papaya	evm.model.supercontig_29.22	No	#N/A	(specialized) Mevalonic acid pathway	No
C. papaya	evm.model.supercontig_32.88	Yes	#N/A	core TPS	No
C. papaya	evm.model.supercontig_32.89	Yes	#N/A	core TPS	No
C. papaya	evm.model.supercontig_48.35	No	#N/A	(specialized) Mevalonic acid pathway	No
C. papaya	evm.model.supercontig_49.166	No	#N/A	core TPS	No
C. papaya	evm.model.supercontig_52.43	No	#N/A	core TPS	No
C. papaya	evm.model.supercontig_531.1	Yes	#N/A	] triterpene (camelliol)	No
C. papaya	evm.model.supercontig_531.3	Yes	#N/A	] triterpene (camelliol)	No
C. papaya	evm.model.supercontig_55.8	No	#N/A	(specialized) MEP pathway	Yes
C. papaya	evm.model.supercontig_585.2	Yes	#N/A	core TPS	No
C. papaya	evm.model.supercontig_585.3	Yes	#N/A	core TPS	No
C. papaya	evm.model.supercontig_596.2	No	#N/A	core TPS	No
C. papaya	evm.model.supercontig_6.348	No	#N/A	(specialized) Mevalonic acid pathway	No
C. papaya	evm.model.supercontig_62.104	No	#N/A	(specialized) MEP pathway	No
C. papaya	evm.model.supercontig_631.3	No	#N/A	(specialized) MEP pathway	No
C. papaya	evm.model.supercontig_76.64	No	#N/A	(specialized) MEP pathway	No
C. papaya	evm.model.supercontig_761.1	No	#N/A	core TPS	No
C. papaya	evm.model.supercontig_8.257	No	#N/A	core TPS	No
C. papaya	evm.model.supercontig_81.3	No	#N/A	core TPS	No
C. papaya	evm.model.supercontig_91.36	No	#N/A	(specialized) MEP pathway	Yes
C. papaya	evm.model.supercontig_91.47	Yes	#N/A	] triterpene (cycloartenol)	No
C. papaya	evm.model.supercontig_91.50	Yes	#N/A	] triterpene (cycloartenol)	No
C. papaya	evm.model.supercontig_91.62	No	#N/A	] triterpene (cycloartenol)	No
C. papaya	evm.TU.contig_32569.1	No	#N/A	core TPS	No
C. papaya	evm.TU.contig_33276.1	No	#N/A	core TPS	No
C. papaya	evm.TU.contig_34924.1	No	#N/A	core TPS	No
A. trichopoda	evm_27.model.AmTr_v1.0_scaffold00001.167	No	Yes	(specialized) Prenyltransferase	No
A. trichopoda	evm_27.model.AmTr_v1.0_scaffold00001.308	No	#N/A	(specialized) MEP pathway	No
A. trichopoda	evm_27.model.AmTr_v1.0_scaffold00002.146	No	#N/A	core TPS	No
A. trichopoda	evm_27.model.AmTr_v1.0_scaffold00003.208	No	Yes	(specialized) Prenyltransferase	No
A. trichopoda	evm_27.model.AmTr_v1.0_scaffold00003.311	Yes	#N/A	core TPS	No
A. trichopoda	evm_27.model.AmTr_v1.0_scaffold00003.315	Yes	#N/A	core TPS	No
A. trichopoda	evm_27.model.AmTr_v1.0_scaffold00007.400	Yes	#N/A	core TPS	No
A. trichopoda	evm_27.model.AmTr_v1.0_scaffold00007.401	Yes	#N/A	core TPS	No
A. trichopoda	evm_27.model.AmTr_v1.0_scaffold00011.118	No	#N/A	core TPS	No
A. trichopoda	evm_27.model.AmTr_v1.0_scaffold00013.110	No	#N/A	(specialized) Mevalonic acid pathway	No
A. trichopoda	evm_27.model.AmTr_v1.0_scaffold00017.276	No	#N/A	core TPS	No
A. trichopoda	evm_27.model.AmTr_v1.0_scaffold00019.215	Yes	#N/A	(specialized) MEP pathway	Yes
A. trichopoda	evm_27.model.AmTr_v1.0_scaffold00019.216	Yes	#N/A	(specialized) MEP pathway	Yes
A. trichopoda	evm_27.model.AmTr_v1.0_scaffold00022.125	No	#N/A	(specialized) Mevalonic acid pathway	No
A. trichopoda	evm_27.model.AmTr_v1.0_scaffold00025.279	No	#N/A	] triterpene (cycloartenol)	No
A. trichopoda	evm_27.model.AmTr_v1.0_scaffold00032.208	No	#N/A	core TPS	No
A. trichopoda	evm_27.model.AmTr_v1.0_scaffold00032.221	Yes	#N/A	core TPS	No
A. trichopoda	evm_27.model.AmTr_v1.0_scaffold00032.223	Yes	#N/A	core TPS	No
A. trichopoda	evm_27.model.AmTr_v1.0_scaffold00032.237	No	#N/A	core TPS	No
A. trichopoda	evm_27.model.AmTr_v1.0_scaffold00033.199	No	#N/A	(specialized) MEP pathway	Yes
A. trichopoda	evm_27.model.AmTr_v1.0_scaffold00033.270	No	#N/A	core TPS	No
A. trichopoda	evm_27.model.AmTr_v1.0_scaffold00036.75	Yes	#N/A	] triterpene (squalene)	No
A. trichopoda	evm_27.model.AmTr_v1.0_scaffold00036.76	Yes	#N/A	] triterpene (squalene)	No
A. trichopoda	evm_27.model.AmTr_v1.0_scaffold00038.87	No	#N/A	(specialized) MEP pathway	No
A. trichopoda	evm_27.model.AmTr_v1.0_scaffold00043.44	Yes	#N/A	core TPS	No
A. trichopoda	evm_27.model.AmTr_v1.0_scaffold00043.45	Yes	#N/A	core TPS	No
A. trichopoda	evm_27.model.AmTr_v1.0_scaffold00043.48	Yes	#N/A	core TPS	No
A. trichopoda	evm_27.model.AmTr_v1.0_scaffold00043.49	Yes	#N/A	core TPS	No
A. trichopoda	evm_27.model.AmTr_v1.0_scaffold00043.50	Yes	#N/A	core TPS	No
A. trichopoda	evm_27.model.AmTr_v1.0_scaffold00045.147	No	Yes	(specialized) Mevalonic acid pathway	No
A. trichopoda	evm_27.model.AmTr_v1.0_scaffold00052.29	No	#N/A	(specialized) MEP pathway	Yes
A. trichopoda	evm_27.model.AmTr_v1.0_scaffold00057.102	No	#N/A	(specialized) MEP pathway	Yes
A. trichopoda	evm_27.model.AmTr_v1.0_scaffold00058.194	No	#N/A	(specialized) MEP pathway	No
A. trichopoda	evm_27.model.AmTr_v1.0_scaffold00059.110	No	#N/A	(specialized) Prenyltransferase	No
A. trichopoda	evm_27.model.AmTr_v1.0_scaffold00059.146	No	#N/A	(specialized) MEP pathway	No
A. trichopoda	evm_27.model.AmTr_v1.0_scaffold00061.202	No	#N/A	(specialized) Prenyltransferase	No
A. trichopoda	evm_27.model.AmTr_v1.0_scaffold00061.248	No	#N/A	(specialized) Mevalonic acid pathway	No
A. trichopoda	evm_27.model.AmTr_v1.0_scaffold00066.146	No	#N/A	core TPS	No
A. trichopoda	evm_27.model.AmTr_v1.0_scaffold00066.195	No	#N/A	core TPS	No
A. trichopoda	evm_27.model.AmTr_v1.0_scaffold00069.144	No	#N/A	(specialized) Mevalonic acid pathway	No
A. trichopoda	evm_27.model.AmTr_v1.0_scaffold00089.110	No	#N/A	(specialized) IPP Isomerase	No
A. trichopoda	evm_27.model.AmTr_v1.0_scaffold00092.58	No	#N/A	(specialized) Prenyltransferase	No
A. trichopoda	evm_27.model.AmTr_v1.0_scaffold00099.141	No	Yes	(specialized) MEP pathway	No
A. trichopoda	evm_27.model.AmTr_v1.0_scaffold00103.20	No	#N/A	core TPS	No
A. trichopoda	evm_27.model.AmTr_v1.0_scaffold00114.16	No	#N/A	(specialized) Mevalonic acid pathway	No
A. trichopoda	evm_27.model.AmTr_v1.0_scaffold00169.1	Yes	#N/A	core TPS	No
A. trichopoda	evm_27.model.AmTr_v1.0_scaffold00169.3	Yes	#N/A	core TPS	No
A. trichopoda	evm_27.model.AmTr_v1.0_scaffold00175.30	No	#N/A	(specialized) MEP pathway	No
A. trichopoda	evm_27.model.AmTr_v1.0_scaffold00566.1	No	#N/A	(specialized) Prenyltransferase	No
A. trichopoda	evm_27.model.AmTr_v1.0_scaffold00713.1	No	#N/A	core TPS	No
C. sativa	gi_112790154_gb_DQ839404.1	No	#N/A	core TPS	No
C. sativa	gi_112790156_gb_DQ839405.1	No	#N/A	core TPS	No
L. sativa	gi_20136334_gb_AF489964.1	No	#N/A	core TPS	No
L. sativa	gi_20136336_gb_AF489965.1	No	#N/A	core TPS	No
L. sativa	gi_329672641_gb_JI575147.1	No	#N/A	] triterpene (camelliol)	No
L. sativa	gi_329673386_gb_JI575892.1	No	#N/A	(specialized) MEP pathway	No
L. sativa	gi_329673456_gb_JI575962.1	No	#N/A	] triterpene (cycloartenol)	No
L. sativa	gi_329673561_gb_JI576067.1	No	#N/A	core TPS	No
L. sativa	gi_329673581_gb_JI576087.1	No	#N/A	(specialized) Mevalonic acid pathway	No
L. sativa	gi_329673615_gb_JI576121.1	No	#N/A	] triterpene (camelliol)	No
L. sativa	gi_329673646_gb_JI576152.1	No	#N/A	] triterpene (camelliol)	No
L. sativa	gi_329673688_gb_JI576194.1	No	#N/A	(specialized) MEP pathway	Yes
L. sativa	gi_329673818_gb_JI576324.1	No	#N/A	core TPS	No
L. sativa	gi_329673858_gb_JI576364.1	No	#N/A	(specialized) MEP pathway	Yes
L. sativa	gi_329673943_gb_JI576449.1	No	#N/A	] triterpene (camelliol)	No
L. sativa	gi_329673988_gb_JI576494.1	No	#N/A	] triterpene (cycloartenol)	No
L. sativa	gi_329674187_gb_JI576693.1	No	#N/A	] triterpene (camelliol)	No
L. sativa	gi_329674209_gb_JI576715.1	No	#N/A	] triterpene (cycloartenol)	No
L. sativa	gi_329674324_gb_JI576830.1	No	#N/A	] triterpene (camelliol)	No
L. sativa	gi_329674517_gb_JI577023.1	No	#N/A	(specialized) MEP pathway	Yes
L. sativa	gi_329674673_gb_JI577179.1	No	#N/A	(specialized) Mevalonic acid pathway	No
L. sativa	gi_329674674_gb_JI577180.1	No	#N/A	(specialized) MEP pathway	Yes
L. sativa	gi_329675419_gb_JI577925.1	No	#N/A	(specialized) Mevalonic acid pathway	No
L. sativa	gi_329675594_gb_JI578100.1	No	#N/A	(specialized) Mevalonic acid pathway	No
L. sativa	gi_329675817_gb_JI578323.1	No	#N/A	core TPS	No
L. sativa	gi_329676099_gb_JI578605.1	No	#N/A	] triterpene (camelliol)	No
L. sativa	gi_329676176_gb_JI578682.1	No	#N/A	(specialized) Mevalonic acid pathway	No
L. sativa	gi_329676986_gb_JI579492.1	No	#N/A	core TPS	No
L. sativa	gi_329677165_gb_JI579671.1	No	#N/A	core TPS	No
L. sativa	gi_329677568_gb_JI580074.1	No	#N/A	core TPS	No
L. sativa	gi_329677582_gb_JI580088.1	No	#N/A	(specialized) Mevalonic acid pathway	No
L. sativa	gi_329677882_gb_JI580388.1	No	#N/A	core TPS	No
L. sativa	gi_329677954_gb_JI580460.1	No	#N/A	core TPS	No
L. sativa	gi_329677975_gb_JI580481.1	No	#N/A	core TPS	No
L. sativa	gi_329678069_gb_JI580575.1	No	#N/A	(specialized) Mevalonic acid pathway	No
L. sativa	gi_329678116_gb_JI580622.1	No	#N/A	core TPS	No
L. sativa	gi_329678164_gb_JI580670.1	No	#N/A	core TPS	No
L. sativa	gi_329678262_gb_JI580768.1	No	#N/A	(specialized) MEP pathway	No
L. sativa	gi_329678319_gb_JI580825.1	No	#N/A	core TPS	No
L. sativa	gi_329678322_gb_JI580828.1	No	#N/A	(specialized) Mevalonic acid pathway	No
L. sativa	gi_329678661_gb_JI581167.1	No	#N/A	(specialized) MEP pathway	No
L. sativa	gi_329678765_gb_JI581271.1	No	#N/A	(specialized) Mevalonic acid pathway	No
L. sativa	gi_329678860_gb_JI581366.1	No	#N/A	(specialized) Prenyltransferase	No
L. sativa	gi_329679402_gb_JI581908.1	No	#N/A	(specialized) Mevalonic acid pathway	No
L. sativa	gi_329679628_gb_JI582134.1	No	#N/A	(specialized) MEP pathway	No
L. sativa	gi_329679863_gb_JI582369.1	No	#N/A	(specialized) Mevalonic acid pathway	No
L. sativa	gi_329679996_gb_JI582502.1	No	#N/A	(specialized) Mevalonic acid pathway	No
L. sativa	gi_329680724_gb_JI583230.1	No	#N/A	(specialized) Mevalonic acid pathway	No
L. sativa	gi_329680873_gb_JI583379.1	No	#N/A	(specialized) MEP pathway	No
L. sativa	gi_329681027_gb_JI583533.1	No	#N/A	core TPS	No
L. sativa	gi_329681196_gb_JI583702.1	No	#N/A	(specialized) Mevalonic acid pathway	No
L. sativa	gi_329681275_gb_JI583781.1	No	#N/A	] triterpene (camelliol)	No
L. sativa	gi_329681325_gb_JI583831.1	No	#N/A	(specialized) Mevalonic acid pathway	No
L. sativa	gi_329681627_gb_JI584133.1	No	#N/A	(specialized) Mevalonic acid pathway	No
L. sativa	gi_329681848_gb_JI584354.1	No	#N/A	(specialized) Mevalonic acid pathway	No
L. sativa	gi_329682015_gb_JI584521.1	No	#N/A	(specialized) Mevalonic acid pathway	No
L. sativa	gi_329682034_gb_JI584540.1	No	#N/A	(specialized) MEP pathway	No
L. sativa	gi_329682276_gb_JI584782.1	No	#N/A	(specialized) Prenyltransferase	No
L. sativa	gi_329682498_gb_JI585004.1	No	#N/A	core TPS	No
L. sativa	gi_329682684_gb_JI585190.1	No	#N/A	(specialized) Prenyltransferase	No
L. sativa	gi_329682733_gb_JI585239.1	No	#N/A	(specialized) Prenyltransferase	No
L. sativa	gi_329682772_gb_JI585278.1	No	#N/A	] triterpene (camelliol)	No
L. sativa	gi_329682859_gb_JI585365.1	No	#N/A	(specialized) Mevalonic acid pathway	No
L. sativa	gi_329683608_gb_JI586114.1	No	#N/A	(specialized) Mevalonic acid pathway	No
L. sativa	gi_329683912_gb_JI586418.1	No	#N/A	] triterpene (squalene)	No
L. sativa	gi_329684102_gb_JI586608.1	No	#N/A	(specialized) MEP pathway	No
L. sativa	gi_329684699_gb_JI587205.1	No	#N/A	] triterpene (camelliol)	No
L. sativa	gi_329684709_gb_JI587215.1	No	#N/A	(specialized) Mevalonic acid pathway	No
L. sativa	gi_329684889_gb_JI587395.1	No	#N/A	(specialized) Mevalonic acid pathway	No
L. sativa	gi_329685607_gb_JI588113.1	No	#N/A	(specialized) Prenyltransferase	No
L. sativa	gi_329685827_gb_JI588333.1	No	#N/A	(specialized) MEP pathway	No
L. sativa	gi_329685982_gb_JI588488.1	No	#N/A	core TPS	No
L. sativa	gi_329686308_gb_JI588814.1	No	#N/A	(specialized) IPP Isomerase	No
L. sativa	gi_329686747_gb_JI589253.1	No	#N/A	] triterpene (thalianol)	No
L. sativa	gi_329686953_gb_JI589459.1	No	#N/A	core TPS	No
L. sativa	gi_329687146_gb_JI589652.1	No	#N/A	core TPS	No
L. sativa	gi_329687547_gb_JI590053.1	No	#N/A	core TPS	No
L. sativa	gi_329687960_gb_JI590466.1	No	#N/A	(specialized) Prenyltransferase	No
L. sativa	gi_329688124_gb_JI590630.1	No	#N/A	core TPS	No
L. sativa	gi_329688864_gb_JI591370.1	No	#N/A	(specialized) Prenyltransferase	No
L. sativa	gi_329689165_gb_JI591671.1	No	#N/A	] triterpene (cycloartenol)	No
L. sativa	gi_329689230_gb_JI591736.1	No	#N/A	(specialized) IPP Isomerase	No
L. sativa	gi_329689333_gb_JI591839.1	No	#N/A	core TPS	No
L. sativa	gi_329689441_gb_JI591947.1	No	#N/A	core TPS	No
L. sativa	gi_329690048_gb_JI592554.1	No	#N/A	core TPS	No
L. sativa	gi_329690096_gb_JI592602.1	No	#N/A	core TPS	No
L. sativa	gi_329690219_gb_JI592725.1	No	#N/A	(specialized) MEP pathway	No
L. sativa	gi_329690337_gb_JI592843.1	No	#N/A	(specialized) MEP pathway	No
L. sativa	gi_329690401_gb_JI592907.1	No	#N/A	core TPS	No
L. sativa	gi_329690997_gb_JI593503.1	No	#N/A	core TPS	No
L. sativa	gi_329691615_gb_JI594121.1	No	#N/A	core TPS	No
L. sativa	gi_329691960_gb_JI594466.1	No	#N/A	core TPS	No
L. sativa	gi_329692109_gb_JI594615.1	No	#N/A	core TPS	No
L. sativa	gi_329692138_gb_JI594644.1	No	#N/A	] triterpene (camelliol)	No
L. sativa	gi_329692169_gb_JI594675.1	No	#N/A	] triterpene (thalianol)	No
L. sativa	gi_329692466_gb_JI594972.1	No	#N/A	core TPS	No
L. sativa	gi_329692714_gb_JI595220.1	No	#N/A	(specialized) Prenyltransferase	No
L. sativa	gi_329692727_gb_JI595233.1	No	#N/A	] triterpene (camelliol)	No
L. sativa	gi_329692807_gb_JI595313.1	No	#N/A	] triterpene (cycloartenol)	No
L. sativa	gi_329692962_gb_JI595468.1	No	#N/A	(specialized) Mevalonic acid pathway	No
L. sativa	gi_329693762_gb_JI596268.1	No	#N/A	] triterpene (camelliol)	No
L. sativa	gi_329694931_gb_JI597437.1	No	#N/A	(specialized) MEP pathway	No
L. sativa	gi_329695092_gb_JI597598.1	No	#N/A	(specialized) Mevalonic acid pathway	No
L. sativa	gi_329695708_gb_JI598214.1	No	#N/A	core TPS	No
L. sativa	gi_329695757_gb_JI598263.1	No	#N/A	core TPS	No
L. sativa	gi_329695930_gb_JI598436.1	No	#N/A	] triterpene (camelliol)	No
L. sativa	gi_329696502_gb_JI599008.1	No	#N/A	core TPS	No
L. sativa	gi_329697603_gb_JI600109.1	No	#N/A	core TPS	No
L. sativa	gi_329699043_gb_JI601549.1	No	#N/A	] triterpene (cycloartenol)	No
L. sativa	gi_329699220_gb_JI601726.1	No	#N/A	core TPS	No
L. sativa	gi_329699779_gb_JI602285.1	No	#N/A	core TPS	No
L. sativa	gi_329699960_gb_JI602466.1	No	#N/A	(specialized) MEP pathway	No
L. sativa	gi_329702064_gb_JI604570.1	No	#N/A	] triterpene (camelliol)	No
L. sativa	gi_329703366_gb_JI605872.1	No	#N/A	] triterpene (camelliol)	No
L. sativa	gi_329703543_gb_JI606049.1	No	#N/A	] triterpene (unknown)	No
L. sativa	gi_329704346_gb_JI606852.1	No	#N/A	(specialized) Prenyltransferase	No
L. sativa	gi_329704542_gb_JI607048.1	No	#N/A	core TPS	No
L. sativa	gi_329705241_gb_JI607747.1	No	#N/A	] triterpene (camelliol)	No
L. sativa	gi_329705595_gb_JI608101.1	No	#N/A	] triterpene (camelliol)	No
L. sativa	gi_329706701_gb_JI609207.1	No	#N/A	core TPS	No
L. sativa	gi_329707371_gb_JI609877.1	No	#N/A	core TPS	No
L. sativa	gi_329708118_gb_JI610624.1	No	#N/A	(specialized) MEP pathway	No
L. sativa	gi_329708348_gb_JI610854.1	No	#N/A	core TPS	No
L. sativa	gi_329708692_gb_JI611198.1	No	#N/A	core TPS	No
L. sativa	gi_329708731_gb_JI611237.1	No	#N/A	core TPS	No
L. sativa	gi_329709960_gb_JI612466.1	No	#N/A	core TPS	No
L. sativa	gi_329710843_gb_JI613349.1	No	#N/A	core TPS	No
L. sativa	gi_329713510_gb_JI616016.1	No	#N/A	(specialized) IPP Isomerase	No
L. sativa	gi_329714147_gb_JI616653.1	No	#N/A	core TPS	No
L. sativa	gi_329719358_gb_JI621864.1	No	#N/A	core TPS	No
L. sativa	gi_329719930_gb_JI622436.1	No	#N/A	core TPS	No
L. sativa	gi_329720127_gb_JI622633.1	No	#N/A	(specialized) Mevalonic acid pathway	No
L. sativa	gi_329720602_gb_JI623108.1	No	#N/A	] triterpene (camelliol)	No
L. sativa	gi_329721685_gb_JI624191.1	No	#N/A	(specialized) Mevalonic acid pathway	No
L. sativa	gi_33033514_dbj_BD223744.1	No	#N/A	(specialized) IPP Isomerase	No
L. sativa	gi_33033515_dbj_BD223745.1	No	#N/A	(specialized) IPP Isomerase	No
C. sativa	gi_351590953_gb_JP449410.1	No	#N/A	core TPS	No
C. sativa	gi_351591360_gb_JP449808.1	No	#N/A	] triterpene (camelliol)	No
C. sativa	gi_351595736_gb_JP450301.1	No	#N/A	core TPS	No
C. sativa	gi_351595989_gb_JP450548.1	No	#N/A	] triterpene (camelliol)	No
C. sativa	gi_351596331_gb_JP450888.1	No	#N/A	] triterpene (camelliol)	No
C. sativa	gi_351596478_gb_JP451034.1	No	#N/A	] triterpene (camelliol)	No
C. sativa	gi_351596767_gb_JP451321.1	No	#N/A	core TPS	No
C. sativa	gi_351596822_gb_JP451376.1	No	#N/A	(specialized) MEP pathway	Yes
C. sativa	gi_351597037_gb_JP451589.1	No	#N/A	core TPS	No
C. sativa	gi_351597071_gb_JP451623.1	No	#N/A	] triterpene (camelliol)	No
C. sativa	gi_351597226_gb_JP451776.1	No	#N/A	(specialized) Mevalonic acid pathway	No
C. sativa	gi_351597247_gb_JP451797.1	No	#N/A	(specialized) Prenyltransferase	No
C. sativa	gi_351597254_gb_JP451804.1	No	#N/A	(specialized) Prenyltransferase	No
C. sativa	gi_351597298_gb_JP451846.1	No	#N/A	core TPS	No
C. sativa	gi_351597580_gb_JP452123.1	No	#N/A	(specialized) MEP pathway	No
C. sativa	gi_351598062_gb_JP452595.1	No	#N/A	(specialized) Prenyltransferase	No
C. sativa	gi_351598072_gb_JP452605.1	No	#N/A	] triterpene (camelliol)	No
C. sativa	gi_351598350_gb_JP452875.1	No	#N/A	core TPS	No
C. sativa	gi_351598352_gb_JP452877.1	No	#N/A	core TPS	No
C. sativa	gi_351598427_gb_JP452951.1	No	#N/A	] triterpene (cycloartenol)	No
C. sativa	gi_351598433_gb_JP452957.1	No	#N/A	] triterpene (camelliol)	No
C. sativa	gi_351598629_gb_JP453144.1	No	#N/A	core TPS	No
C. sativa	gi_351599003_gb_JP453508.1	No	#N/A	core TPS	No
C. sativa	gi_351599080_gb_JP453584.1	No	#N/A	core TPS	No
C. sativa	gi_351599113_gb_JP453616.1	No	#N/A	] triterpene (camelliol)	No
C. sativa	gi_351599191_gb_JP453691.1	No	#N/A	] triterpene (camelliol)	No
C. sativa	gi_351599487_gb_JP453980.1	No	#N/A	core TPS	No
C. sativa	gi_351599542_gb_JP454034.1	No	#N/A	core TPS	No
C. sativa	gi_351599734_gb_JP454220.1	No	#N/A	(specialized) Mevalonic acid pathway	No
C. sativa	gi_351600085_gb_JP454561.1	No	#N/A	core TPS	No
C. sativa	gi_351600371_gb_JP454840.1	No	#N/A	core TPS	No
C. sativa	gi_351600685_gb_JP455148.1	No	#N/A	(specialized) MEP pathway	Yes
C. sativa	gi_351601483_gb_JP455928.1	No	#N/A	] triterpene (camelliol)	No
C. sativa	gi_351601586_gb_JP456028.1	No	#N/A	] triterpene (unknown)	No
C. sativa	gi_351602058_gb_JP456491.1	No	#N/A	core TPS	No
C. sativa	gi_351602134_gb_JP456567.1	No	#N/A	core TPS	No
C. sativa	gi_351602195_gb_JP456626.1	No	#N/A	core TPS	No
C. sativa	gi_351602196_gb_JP456627.1	No	#N/A	core TPS	No
C. sativa	gi_351603002_gb_JP457362.1	No	#N/A	core TPS	No
C. sativa	gi_351603104_gb_JP457464.1	No	#N/A	core TPS	No
C. sativa	gi_351603543_gb_JP457900.1	No	#N/A	core TPS	No
C. sativa	gi_351603846_gb_JP458201.1	No	#N/A	] triterpene (camelliol)	No
C. sativa	gi_351603869_gb_JP458224.1	No	#N/A	] triterpene (camelliol)	No
C. sativa	gi_351603988_gb_JP458342.1	No	#N/A	core TPS	No
C. sativa	gi_351604407_gb_JP458759.1	No	#N/A	core TPS	No
C. sativa	gi_351604748_gb_JP459097.1	No	#N/A	] triterpene (camelliol)	No
C. sativa	gi_351605538_gb_JP459882.1	No	#N/A	core TPS	No
C. sativa	gi_351605649_gb_JP459992.1	No	#N/A	core TPS	No
C. sativa	gi_351605776_gb_JP460118.1	No	#N/A	(specialized) Mevalonic acid pathway	No
C. sativa	gi_351605926_gb_JP460266.1	No	#N/A	] triterpene (camelliol)	No
C. sativa	gi_351605999_gb_JP460336.1	No	#N/A	core TPS	No
C. sativa	gi_351606218_gb_JP460548.1	No	#N/A	(specialized) Prenyltransferase	No
C. sativa	gi_351606283_gb_JP460612.1	No	#N/A	core TPS	No
C. sativa	gi_351606317_gb_JP460646.1	No	#N/A	core TPS	No
C. sativa	gi_351606632_gb_JP460958.1	No	#N/A	core TPS	No
C. sativa	gi_351606709_gb_JP461035.1	No	#N/A	(specialized) MEP pathway	No
C. sativa	gi_351606854_gb_JP461179.1	No	#N/A	core TPS	No
C. sativa	gi_351607827_gb_JP462142.1	No	#N/A	] triterpene (camelliol)	No
C. sativa	gi_351608908_gb_JP463209.1	No	#N/A	core TPS	No
C. sativa	gi_351609153_gb_JP463454.1	No	#N/A	core TPS	No
C. sativa	gi_351611612_gb_JP465913.1	No	#N/A	(specialized) MEP pathway	No
C. sativa	gi_351612464_gb_JP466765.1	No	#N/A	(specialized) MEP pathway	No
C. sativa	gi_351613124_gb_JP467425.1	No	#N/A	(specialized) MEP pathway	No
C. sativa	gi_351613818_gb_JP468119.1	No	#N/A	(specialized) MEP pathway	Yes
C. sativa	gi_351615101_gb_JP469402.1	No	#N/A	core TPS	No
C. sativa	gi_351616427_gb_JP470728.1	No	#N/A	core TPS	No
C. sativa	gi_351616790_gb_JP471091.1	No	#N/A	(specialized) MEP pathway	No
C. sativa	gi_351617240_gb_JP471541.1	No	#N/A	core TPS	No
C. sativa	gi_351617545_gb_JP471846.1	No	#N/A	(specialized) Prenyltransferase	No
C. sativa	gi_351617866_gb_JP472167.1	No	#N/A	] triterpene (camelliol)	No
C. sativa	gi_351618428_gb_JP472729.1	No	#N/A	(specialized) Mevalonic acid pathway	No
C. sativa	gi_351618646_gb_JP472947.1	No	#N/A	] triterpene (squalene)	No
C. sativa	gi_351619343_gb_JP473644.1	No	#N/A	] triterpene (camelliol)	No
C. sativa	gi_351619526_gb_JP473827.1	No	#N/A	core TPS	No
C. sativa	gi_351620835_gb_JP475136.1	No	#N/A	core TPS	No
C. sativa	gi_351621033_gb_JP475334.1	No	#N/A	(specialized) IPP Isomerase	No
C. sativa	gi_351621758_gb_JP476059.1	No	#N/A	(specialized) MEP pathway	Yes
C. sativa	gi_351622011_gb_JP476312.1	No	#N/A	core TPS	No
C. sativa	gi_351622182_gb_JP476483.1	No	#N/A	] triterpene (camelliol)	No
C. sativa	gi_351622508_gb_JP476809.1	No	#N/A	(specialized) Mevalonic acid pathway	No
C. sativa	gi_351622881_gb_JP477182.1	No	#N/A	(specialized) MEP pathway	No
C. sativa	gi_351623061_gb_JP477362.1	No	#N/A	(specialized) Prenyltransferase	No
C. sativa	gi_351623477_gb_JP477778.1	No	#N/A	] triterpene (camelliol)	No
C. sativa	gi_351623685_gb_JP477986.1	No	#N/A	] triterpene (camelliol)	No
C. sativa	gi_351623833_gb_JP478134.1	No	#N/A	core TPS	No
C. sativa	gi_351624321_gb_JP478622.1	No	#N/A	(specialized) Mevalonic acid pathway	No
C. sativa	gi_351624400_gb_JP478701.1	No	#N/A	(specialized) Mevalonic acid pathway	No
C. sativa	gi_351624471_gb_JP478772.1	No	#N/A	core TPS	No
C. sativa	gi_351624499_gb_JP478800.1	No	#N/A	] triterpene (camelliol)	No
C. sativa	gi_351624863_gb_JP479164.1	No	#N/A	(specialized) Mevalonic acid pathway	No
C. sativa	gi_351624889_gb_JP479190.1	No	#N/A	(specialized) Mevalonic acid pathway	No
C. sativa	gi_351624995_gb_JP479296.1	No	#N/A	] triterpene (cycloartenol)	No
C. sativa	gi_351625146_gb_JP479447.1	No	#N/A	] triterpene (camelliol)	No
C. sativa	gi_351625323_gb_JP479624.1	No	#N/A	] triterpene (camelliol)	No
C. sativa	gi_351625503_gb_JP479804.1	No	#N/A	core TPS	No
C. sativa	gi_351625570_gb_JP479871.1	No	#N/A	core TPS	No
C. sativa	gi_351625668_gb_JP479969.1	No	#N/A	core TPS	No
C. sativa	gi_351627281_gb_JP480164.1	No	#N/A	] triterpene (cycloartenol)	No
C. sativa	gi_351627348_gb_JP480231.1	No	#N/A	] triterpene (camelliol)	No
C. sativa	gi_351627441_gb_JP480324.1	No	#N/A	core TPS	No
C. sativa	gi_351627802_gb_JP480685.1	No	#N/A	] triterpene (cycloartenol)	No
C. sativa	gi_351627984_gb_JP480867.1	No	#N/A	(specialized) Mevalonic acid pathway	No
C. sativa	gi_351628052_gb_JP480935.1	No	#N/A	(specialized) MEP pathway	Yes
C. sativa	gi_351628837_gb_JP481720.1	No	#N/A	core TPS	No
C. sativa	gi_351628868_gb_JP481751.1	No	#N/A	] triterpene (camelliol)	No
C. sativa	gi_351628874_gb_JP481757.1	No	#N/A	(specialized) MEP pathway	No
C. sativa	gi_351628875_gb_JP481758.1	No	#N/A	core TPS	No
C. sativa	gi_351628883_gb_JP481766.1	No	#N/A	core TPS	No
C. sativa	gi_351629476_gb_JP482359.1	No	#N/A	core TPS	No
C. sativa	gi_548939640_emb_JB348881.1	No	#N/A	(specialized) Mevalonic acid pathway	No
C. sativa	gi_548939641_emb_JB348882.1	No	#N/A	(specialized) Mevalonic acid pathway	No
C. sativa	gi_6856553_gb_AF188062.1	No	#N/A	(specialized) IPP Isomerase	No
C. sativa	gi_6856555_gb_AF188063.1	No	#N/A	(specialized) IPP Isomerase	No
L. sativa	gi_9971222_dbj_AB031204.1	No	#N/A	core TPS	No
L. sativa	gi_9971224_dbj_AB031205.1	No	#N/A	core TPS	No
G. max	Glyma01g00430	Yes	#N/A	] triterpene (cycloartenol)	No
G. max	Glyma01g00450	Yes	#N/A	] triterpene (cycloartenol)	No
G. max	Glyma01g36080	No	Yes	(specialized) Mevalonic acid pathway	No
G. max	Glyma01g38481	No	Yes	(specialized) Prenyltransferase	No
G. max	Glyma01g42450	No	Yes	(specialized) Mevalonic acid pathway	No
G. max	Glyma02g06590	No	Yes	(specialized) Prenyltransferase	No
G. max	Glyma02g28927	No	#N/A	(specialized) Prenyltransferase	No
G. max	Glyma02g35965	No	#N/A	(specialized) Prenyltransferase	No
G. max	Glyma02g44070	No	Yes	(specialized) Mevalonic acid pathway	No
G. max	Glyma02g47860	No	Yes	(specialized) Mevalonic acid pathway	No
G. max	Glyma0313s50	No	#N/A	core TPS	No
G. max	Glyma03g27620	Yes	#N/A	] triterpene (camelliol)	No
G. max	Glyma03g27661	Yes	#N/A	] triterpene (camelliol)	No
G. max	Glyma03g27681	Yes	#N/A	] triterpene (camelliol)	No
G. max	Glyma03g31080	No	#N/A	core TPS	No
G. max	Glyma03g31111	No	Yes	core TPS	No
G. max	Glyma03g39890	No	Yes	(specialized) Mevalonic acid pathway	No
G. max	Glyma04g07400	No	Yes	(specialized) MEP pathway	Yes
G. max	Glyma04g33335	No	#N/A	(specialized) Mevalonic acid pathway	No
G. max	Glyma04g34770	No	#N/A	(specialized) Prenyltransferase	No
G. max	Glyma04g41570	No	Yes	(specialized) Mevalonic acid pathway	No
G. max	Glyma05g02190	No	Yes	(specialized) MEP pathway	No
G. max	Glyma05g03600	No	Yes	(specialized) Mevalonic acid pathway	No
G. max	Glyma05g21570	No	Yes	(specialized) Prenyltransferase	No
G. max	Glyma06g07491	No	Yes	(specialized) MEP pathway	Yes
G. max	Glyma06g13260	No	Yes	(specialized) Mevalonic acid pathway	No
G. max	Glyma06g44651	No	#N/A	core TPS	No
G. max	Glyma06g45780	No	Yes	core TPS	No
G. max	Glyma07g00330	No	Yes	] triterpene (camelliol)	No
G. max	Glyma07g30700	Yes	#N/A	core TPS	No
G. max	Glyma07g30710	Yes	Yes	core TPS	No
G. max	Glyma07g31210	No	Yes	core TPS	No
G. max	Glyma07g38260	No	Yes	(specialized) MEP pathway	Yes
G. max	Glyma07g39870	No	Yes	(specialized) Mevalonic acid pathway	No
G. max	Glyma08g03060	No	#N/A	] triterpene (cycloartenol)	No
G. max	Glyma08g06590	No	#N/A	core TPS	No
G. max	Glyma08g09890	No	#N/A	(specialized) Prenyltransferase	No
G. max	Glyma08g17470	No	Yes	core TPS	No
G. max	Glyma08g24160	No	Yes	] triterpene (camelliol)	No
G. max	Glyma08g37670	Yes	#N/A	(specialized) MEP pathway	Yes
G. max	Glyma08g37680	Yes	#N/A	(specialized) MEP pathway	Yes
G. max	Glyma08g47450	No	#N/A	] triterpene (cycloartenol)	No
G. max	Glyma09g01820	No	Yes	(specialized) Prenyltransferase	No
G. max	Glyma09g21900	No	#N/A	core TPS	No
G. max	Glyma09g27380	No	Yes	(specialized) Mevalonic acid pathway	No
G. max	Glyma09g32850	No	Yes	(specialized) Mevalonic acid pathway	No
G. max	Glyma09g33320	No	#N/A	(specialized) MEP pathway	Yes
G. max	Glyma09g38550	No	Yes	(specialized) IPP Isomerase	No
G. max	Glyma10g42630	No	Yes	(specialized) Mevalonic acid pathway	No
G. max	Glyma11g02380	No	#N/A	(specialized) MEP pathway	No
G. max	Glyma11g02950	No	Yes	(specialized) Mevalonic acid pathway	No
G. max	Glyma11g06820	No	Yes	(specialized) Prenyltransferase	No
G. max	Glyma11g09330	No	Yes	(specialized) Mevalonic acid pathway	No
G. max	Glyma11g12870	No	Yes	(specialized) MEP pathway	No
G. max	Glyma12g05010	No	Yes	(specialized) MEP pathway	No
G. max	Glyma12g10990	No	Yes	core TPS	No
G. max	Glyma12g16830	Yes	#N/A	core TPS	No
G. max	Glyma12g16940	Yes	#N/A	core TPS	No
G. max	Glyma12g16990	Yes	Yes	core TPS	No
G. max	Glyma12g17240	No	#N/A	(specialized) MEP pathway	No
G. max	Glyma12g17390	No	#N/A	core TPS	No
G. max	Glyma12g29590	No	Yes	(specialized) MEP pathway	No
G. max	Glyma12g32370	Yes	#N/A	core TPS	No
G. max	Glyma12g32381	Yes	Yes	core TPS	No
G. max	Glyma12g34430	No	Yes	core TPS	No
G. max	Glyma13g01280	No	Yes	(specialized) MEP pathway	Yes
G. max	Glyma13g03820	No	#N/A	] triterpene (squalene)	No
G. max	Glyma13g04120	No	#N/A	(specialized) MEP pathway	No
G. max	Glyma13g25266	Yes	#N/A	core TPS	No
G. max	Glyma13g25273	Yes	#N/A	core TPS	No
G. max	Glyma13g28470	No	Yes	(specialized) MEP pathway	Yes
G. max	Glyma13g31681	No	Yes	core TPS	No
G. max	Glyma13g32200	No	Yes	] triterpene (camelliol)	No
G. max	Glyma13g32380	No	Yes	core TPS	No
G. max	Glyma13g36090	No	Yes	core TPS	No
G. max	Glyma13g38050	Yes	Yes	core TPS	No
G. max	Glyma13g38065	Yes	#N/A	core TPS	No
G. max	Glyma13g40140	Yes	Yes	(specialized) MEP pathway	No
G. max	Glyma13g40161	Yes	#N/A	(specialized) Prenyltransferase	No
G. max	Glyma14g00760	No	Yes	(specialized) Mevalonic acid pathway	No
G. max	Glyma14g02330	No	#N/A	(specialized) Mevalonic acid pathway	No
G. max	Glyma14g05020	No	Yes	(specialized) Mevalonic acid pathway	No
G. max	Glyma15g07110	No	Yes	] triterpene (camelliol)	No
G. max	Glyma15g10610	No	Yes	(specialized) MEP pathway	Yes
G. max	Glyma15g10870	No	#N/A	] triterpene (camelliol)	No
G. max	Glyma15g12780	No	Yes	(specialized) Prenyltransferase	No
G. max	Glyma15g32590	No	#N/A	(specialized) Mevalonic acid pathway	No
G. max	Glyma15g35330	No	#N/A	] triterpene (cycloartenol)	No
G. max	Glyma15g41670	No	Yes	core TPS	No
G. max	Glyma16g10880	No	#N/A	(specialized) MEP pathway	No
G. max	Glyma16g21620	No	Yes	(specialized) Mevalonic acid pathway	No
G. max	Glyma16g25620	No	Yes	(specialized) Prenyltransferase	No
G. max	Glyma16g32480	No	Yes	(specialized) Mevalonic acid pathway	No
G. max	Glyma17g00611	No	#N/A	(specialized) MEP pathway	No
G. max	Glyma17g00910	No	Yes	(specialized) Mevalonic acid pathway	No
G. max	Glyma17g02480	No	Yes	(specialized) MEP pathway	Yes
G. max	Glyma17g05500	No	#N/A	core TPS	No
G. max	Glyma17g07400	No	Yes	(specialized) MEP pathway	Yes
G. max	Glyma17g09740	No	Yes	(specialized) MEP pathway	No
G. max	Glyma17g14150	No	Yes	(specialized) Mevalonic acid pathway	No
G. max	Glyma17g18160	No	Yes	(specialized) Prenyltransferase	No
G. max	Glyma17g21180	No	#N/A	(specialized) MEP pathway	No
G. max	Glyma18g28830	No	#N/A	(specialized) MEP pathway	Yes
G. max	Glyma18g47770	Yes	Yes	(specialized) IPP Isomerase	No
G. max	Glyma19g32660	No	#N/A	(specialized) Prenyltransferase	No
G. max	Glyma19g33921	Yes	#N/A	core TPS	No
G. max	Glyma19g33951	Yes	Yes	core TPS	No
G. max	Glyma19g42440	No	Yes	(specialized) Mevalonic acid pathway	No
G. max	Glyma20g05530	No	#N/A	(specialized) Mevalonic acid pathway	No
G. max	Glyma20g08930	No	#N/A	(specialized) MEP pathway	No
G. max	Glyma20g11177	No	#N/A	(specialized) Prenyltransferase	No
G. max	Glyma20g18280	No	#N/A	core TPS	No
G. max	Glyma20g24400	No	Yes	(specialized) Mevalonic acid pathway	No
G. max	Glyma20g33450	No	#N/A	] triterpene (cycloartenol)	No
Z. mays	GRMZM2G001645	No	Yes	(specialized) Mevalonic acid pathway	No
Z. mays	GRMZM2G004131	No	Yes	(specialized) Prenyltransferase	No
Z. mays	GRMZM2G005909	No	Yes	(specialized) Prenyltransferase	No
Z. mays	GRMZM2G006937	No	Yes	] triterpene (cycloartenol)	No
Z. mays	GRMZM2G010356	No	#N/A	core TPS	No
Z. mays	GRMZM2G011151	Yes	#N/A	core TPS	No
Z. mays	GRMZM2G011655	Yes	#N/A	] triterpene (squalene)	No
Z. mays	GRMZM2G011915	Yes	#N/A	] triterpene (squalene)	No
Z. mays	GRMZM2G014508	No	#N/A	(specialized) Prenyltransferase	No
Z. mays	GRMZM2G016254	Yes	#N/A	core TPS	No
Z. mays	GRMZM2G016922	Yes	#N/A	core TPS	No
Z. mays	GRMZM2G019144	Yes	#N/A	(specialized) Mevalonic acid pathway	No
Z. mays	GRMZM2G019260	Yes	Yes	(specialized) Mevalonic acid pathway	No
Z. mays	GRMZM2G023798	No	#N/A	] triterpene (cycloartenol)	No
Z. mays	GRMZM2G027059	No	#N/A	(specialized) MEP pathway	No
Z. mays	GRMZM2G028306	No	#N/A	core TPS	No
Z. mays	GRMZM2G030583	Yes	Yes	core TPS	No
Z. mays	GRMZM2G030839	Yes	Yes	(specialized) Mevalonic acid pathway	No
Z. mays	GRMZM2G036290	No	Yes	(specialized) MEP pathway	No
Z. mays	GRMZM2G038153	Yes	#N/A	core TPS	No
Z. mays	GRMZM2G038340	Yes	#N/A	core TPS	No
Z. mays	GRMZM2G043503	No	#N/A	(specialized) Mevalonic acid pathway	No
Z. mays	GRMZM2G044481	No	#N/A	core TPS	No
Z. mays	GRMZM2G046615	No	#N/A	core TPS	No
Z. mays	GRMZM2G049538	No	#N/A	core TPS	No
Z. mays	GRMZM2G056975	No	Yes	(specialized) MEP pathway	No
Z. mays	GRMZM2G058095	Yes	Yes	(specialized) Mevalonic acid pathway	No
Z. mays	GRMZM2G058404	Yes	#N/A	(specialized) Prenyltransferase	No
Z. mays	GRMZM2G061016	No	#N/A	core TPS	No
Z. mays	GRMZM2G064406	No	Yes	core TPS	No
Z. mays	GRMZM2G065494	Yes	Yes	] triterpene (cycloartenol)	No
Z. mays	GRMZM2G068808	No	#N/A	core TPS	No
Z. mays	GRMZM2G070351	Yes	#N/A	(specialized) Mevalonic acid pathway	No
Z. mays	GRMZM2G070575	Yes	#N/A	] triterpene (cycloartenol)	No
Z. mays	GRMZM2G074015	Yes	#N/A	(specialized) Mevalonic acid pathway	No
Z. mays	GRMZM2G074309	Yes	#N/A	core TPS	No
Z. mays	GRMZM2G081151	Yes	#N/A	] triterpene (cycloartenol)	No
Z. mays	GRMZM2G081554	Yes	#N/A	core TPS	No
Z. mays	GRMZM2G084496	No	#N/A	core TPS	No
Z. mays	GRMZM2G085474	No	#N/A	(specialized) Mevalonic acid pathway	No
Z. mays	GRMZM2G086590	No	#N/A	] triterpene (cycloartenol)	No
Z. mays	GRMZM2G087207	No	Yes	(specialized) Mevalonic acid pathway	No
Z. mays	GRMZM2G093526	Yes	#N/A	core TPS	No
Z. mays	GRMZM2G093603	Yes	#N/A	core TPS	No
Z. mays	GRMZM2G098569	No	Yes	(specialized) Prenyltransferase	No
Z. mays	GRMZM2G100060	No	#N/A	] triterpene (cycloartenol)	No
Z. mays	GRMZM2G102550	No	Yes	(specialized) Prenyltransferase	No
Z. mays	GRMZM2G106263	No	Yes	(specialized) Mevalonic acid pathway	No
Z. mays	GRMZM2G108285	Yes	#N/A	(specialized) IPP Isomerase	No
Z. mays	GRMZM2G108609	Yes	#N/A	core TPS	No
Z. mays	GRMZM2G117319	No	#N/A	core TPS	No
Z. mays	GRMZM2G127087	Yes	#N/A	core TPS	No
Z. mays	GRMZM2G127336	Yes	#N/A	core TPS	No
Z. mays	GRMZM2G133082	No	Yes	(specialized) IPP Isomerase	No
Z. mays	GRMZM2G135085	No	Yes	(specialized) Mevalonic acid pathway	No
Z. mays	GRMZM2G136465	No	Yes	(specialized) Mevalonic acid pathway	No
Z. mays	GRMZM2G137151	Yes	#N/A	(specialized) MEP pathway	Yes
Z. mays	GRMZM2G137176	Yes	#N/A	] triterpene (squalene)	No
Z. mays	GRMZM2G137409	Yes	#N/A	(specialized) MEP pathway	No
Z. mays	GRMZM2G137786	Yes	#N/A	] triterpene (cycloartenol)	No
Z. mays	GRMZM2G145029	No	Yes	(specialized) IPP Isomerase	No
Z. mays	GRMZM2G147721	No	Yes	(specialized) Prenyltransferase	No
Z. mays	GRMZM2G156398	Yes	#N/A	] triterpene (camelliol)	No
Z. mays	GRMZM2G156748	Yes	#N/A	] triterpene (cycloartenol)	No
Z. mays	GRMZM2G168681	No	Yes	(specialized) Prenyltransferase	No
Z. mays	GRMZM2G172032	No	#N/A	(specialized) MEP pathway	No
Z. mays	GRMZM2G173641	No	#N/A	(specialized) MEP pathway	Yes
Z. mays	GRMZM2G177098	No	Yes	core TPS	No
Z. mays	GRMZM2G179092	No	#N/A	core TPS	No
Z. mays	GRMZM2G305148	No	Yes	] triterpene (cycloartenol)	No
Z. mays	GRMZM2G309126	No	#N/A	core TPS	No
Z. mays	GRMZM2G319445	No	#N/A	core TPS	No
Z. mays	GRMZM2G341010	No	#N/A	] triterpene (cycloartenol)	No
Z. mays	GRMZM2G379271	No	#N/A	(specialized) MEP pathway	No
Z. mays	GRMZM2G386051	No	#N/A	] triterpene (squalene)	No
Z. mays	GRMZM2G390124	Yes	#N/A	core TPS	No
Z. mays	GRMZM2G390429	Yes	#N/A	] triterpene (cycloartenol)	No
Z. mays	GRMZM2G391312	No	#N/A	core TPS	No
Z. mays	GRMZM2G393337	No	Yes	(specialized) Mevalonic acid pathway	No
Z. mays	GRMZM2G396451	No	#N/A	(specialized) Mevalonic acid pathway	No
Z. mays	GRMZM2G413253	No	#N/A	(specialized) Mevalonic acid pathway	No
Z. mays	GRMZM2G445854	No	#N/A	core TPS	No
Z. mays	GRMZM2G451187	No	#N/A	core TPS	No
Z. mays	GRMZM2G465812	Yes	#N/A	core TPS	No
Z. mays	GRMZM2G468929	Yes	#N/A	] triterpene (cycloartenol)	No
Z. mays	GRMZM2G469298	No	#N/A	] triterpene (cycloartenol)	No
Z. mays	GRMZM2G483889	No	#N/A	(specialized) Prenyltransferase	No
Z. mays	GRMZM2G493395	No	#N/A	(specialized) MEP pathway	Yes
Z. mays	GRMZM5G830250	No	Yes	(specialized) Mevalonic acid pathway	No
Z. mays	GRMZM5G835542	No	Yes	(specialized) MEP pathway	No
Z. mays	GRMZM5G856881	Yes	#N/A	(specialized) MEP pathway	No
Z. mays	GRMZM5G859195	Yes	#N/A	(specialized) MEP pathway	No
Z. mays	GRMZM5G860137	Yes	#N/A	(specialized) Mevalonic acid pathway	No
Z. mays	GRMZM5G866758	Yes	Yes	(specialized) Mevalonic acid pathway	No
V. vinifera	GSVIVG01000037001	Yes	#N/A	(specialized) Mevalonic acid pathway	No
V. vinifera	GSVIVG01000401001	Yes	#N/A	core TPS	No
V. vinifera	GSVIVG01000402001	Yes	#N/A	core TPS	No
V. vinifera	GSVIVG01000403001	Yes	#N/A	core TPS	No
V. vinifera	GSVIVG01000410001	Yes	#N/A	core TPS	No
V. vinifera	GSVIVG01000414001	Yes	#N/A	core TPS	No
V. vinifera	GSVIVG01000849001	Yes	#N/A	] triterpene (squalene)	No
V. vinifera	GSVIVG01001153001	Yes	#N/A	core TPS	No
V. vinifera	GSVIVG01001155001	Yes	#N/A	core TPS	No
V. vinifera	GSVIVG01001721001	Yes	#N/A	] triterpene (cycloartenol)	No
V. vinifera	GSVIVG01001722001	Yes	#N/A	] triterpene (cycloartenol)	No
V. vinifera	GSVIVG01001723001	Yes	#N/A	] triterpene (cycloartenol)	No
V. vinifera	GSVIVG01001724001	Yes	#N/A	] triterpene (cycloartenol)	No
V. vinifera	GSVIVG01002351001	No	#N/A	core TPS	No
V. vinifera	GSVIVG01002718001	No	#N/A	core TPS	No
V. vinifera	GSVIVG01003955001	No	#N/A	(specialized) MEP pathway	Yes
V. vinifera	GSVIVG01004411001	No	#N/A	core TPS	No
V. vinifera	GSVIVG01005217001	Yes	#N/A	core TPS	No
V. vinifera	GSVIVG01005218001	Yes	#N/A	core TPS	No
V. vinifera	GSVIVG01005220001	Yes	#N/A	core TPS	No
V. vinifera	GSVIVG01005221001	Yes	#N/A	core TPS	No
V. vinifera	GSVIVG01005268001	Yes	#N/A	core TPS	No
V. vinifera	GSVIVG01005271001	Yes	#N/A	core TPS	No
V. vinifera	GSVIVG01005272001	Yes	#N/A	core TPS	No
V. vinifera	GSVIVG01005681001	No	Yes	(specialized) Prenyltransferase	No
V. vinifera	GSVIVG01006342001	Yes	#N/A	core TPS	No
V. vinifera	GSVIVG01006399001	Yes	#N/A	core TPS	No
V. vinifera	GSVIVG01006400001	Yes	#N/A	core TPS	No
V. vinifera	GSVIVG01006464001	Yes	#N/A	core TPS	No
V. vinifera	GSVIVG01006465001	Yes	#N/A	core TPS	No
V. vinifera	GSVIVG01006466001	Yes	#N/A	core TPS	No
V. vinifera	GSVIVG01006467001	Yes	#N/A	core TPS	No
V. vinifera	GSVIVG01006468001	Yes	#N/A	core TPS	No
V. vinifera	GSVIVG01006469001	Yes	#N/A	core TPS	No
V. vinifera	GSVIVG01006487001	Yes	#N/A	core TPS	No
V. vinifera	GSVIVG01006589001	Yes	#N/A	core TPS	No
V. vinifera	GSVIVG01006591001	Yes	#N/A	core TPS	No
V. vinifera	GSVIVG01006638001	Yes	#N/A	core TPS	No
V. vinifera	GSVIVG01006642001	Yes	#N/A	core TPS	No
V. vinifera	GSVIVG01006955001	No	#N/A	core TPS	No
V. vinifera	GSVIVG01007332001	No	#N/A	(specialized) Mevalonic acid pathway	No
V. vinifera	GSVIVG01007468001	No	#N/A	core TPS	No
V. vinifera	GSVIVG01007752001	No	#N/A	(specialized) MEP pathway	No
V. vinifera	GSVIVG01008388001	No	#N/A	(specialized) Mevalonic acid pathway	No
V. vinifera	GSVIVG01009654001	No	Yes	(specialized) Prenyltransferase	No
V. vinifera	GSVIVG01010658001	Yes	Yes	(specialized) Mevalonic acid pathway	No
V. vinifera	GSVIVG01010662001	Yes	#N/A	(specialized) Mevalonic acid pathway	No
V. vinifera	GSVIVG01011287001	No	#N/A	(specialized) Mevalonic acid pathway	No
V. vinifera	GSVIVG01012363001	No	#N/A	core TPS	No
V. vinifera	GSVIVG01013024001	No	#N/A	(specialized) Mevalonic acid pathway	No
V. vinifera	GSVIVG01013194001	No	#N/A	(specialized) MEP pathway	No
V. vinifera	GSVIVG01013435001	No	#N/A	(specialized) Mevalonic acid pathway	No
V. vinifera	GSVIVG01013515001	Yes	#N/A	core TPS	No
V. vinifera	GSVIVG01013517001	Yes	#N/A	core TPS	No
V. vinifera	GSVIVG01013518001	Yes	#N/A	core TPS	No
V. vinifera	GSVIVG01014174001	Yes	#N/A	core TPS	No
V. vinifera	GSVIVG01014175001	Yes	#N/A	core TPS	No
V. vinifera	GSVIVG01014323001	Yes	#N/A	core TPS	No
V. vinifera	GSVIVG01014324001	Yes	Yes	core TPS	No
V. vinifera	GSVIVG01014325001	Yes	#N/A	core TPS	No
V. vinifera	GSVIVG01014557001	Yes	Yes	core TPS	No
V. vinifera	GSVIVG01014558001	Yes	#N/A	core TPS	No
V. vinifera	GSVIVG01014562001	Yes	#N/A	core TPS	No
V. vinifera	GSVIVG01014563001	Yes	#N/A	core TPS	No
V. vinifera	GSVIVG01014565001	Yes	#N/A	core TPS	No
V. vinifera	GSVIVG01014566001	Yes	#N/A	core TPS	No
V. vinifera	GSVIVG01014569001	Yes	#N/A	core TPS	No
V. vinifera	GSVIVG01014738001	No	#N/A	(specialized) Prenyltransferase	No
V. vinifera	GSVIVG01014893001	No	#N/A	core TPS	No
V. vinifera	GSVIVG01015848001	No	#N/A	(specialized) Mevalonic acid pathway	No
V. vinifera	GSVIVG01015993001	Yes	#N/A	] triterpene (cycloartenol)	No
V. vinifera	GSVIVG01015994001	Yes	#N/A	] triterpene (cycloartenol)	No
V. vinifera	GSVIVG01016842001	No	#N/A	(specialized) MEP pathway	Yes
V. vinifera	GSVIVG01017730001	No	#N/A	(specialized) Prenyltransferase	No
V. vinifera	GSVIVG01017832001	No	#N/A	(specialized) MEP pathway	Yes
V. vinifera	GSVIVG01018434001	No	Yes	(specialized) Mevalonic acid pathway	No
V. vinifera	GSVIVG01018566001	No	#N/A	(specialized) Mevalonic acid pathway	No
V. vinifera	GSVIVG01019089001	No	#N/A	(specialized) IPP Isomerase	No
V. vinifera	GSVIVG01019299001	No	#N/A	(specialized) Prenyltransferase	No
V. vinifera	GSVIVG01019415001	No	#N/A	(specialized) MEP pathway	No
V. vinifera	GSVIVG01019875001	No	Yes	(specialized) Mevalonic acid pathway	No
V. vinifera	GSVIVG01021473001	Yes	#N/A	] triterpene (camelliol)	No
V. vinifera	GSVIVG01021474001	Yes	#N/A	] triterpene (camelliol)	No
V. vinifera	GSVIVG01021476001	Yes	#N/A	] triterpene (camelliol)	No
V. vinifera	GSVIVG01021477001	Yes	#N/A	] triterpene (camelliol)	No
V. vinifera	GSVIVG01021482001	Yes	#N/A	] triterpene (camelliol)	No
V. vinifera	GSVIVG01021483001	Yes	#N/A	] triterpene (lupeol)	No
V. vinifera	GSVIVG01021484001	Yes	#N/A	] triterpene (camelliol)	No
V. vinifera	GSVIVG01021485001	Yes	#N/A	] triterpene (camelliol)	No
V. vinifera	GSVIVG01021486001	Yes	#N/A	] triterpene (camelliol)	No
V. vinifera	GSVIVG01021489001	Yes	#N/A	] triterpene (camelliol)	No
V. vinifera	GSVIVG01021494001	Yes	#N/A	] triterpene (camelliol)	No
V. vinifera	GSVIVG01021495001	Yes	#N/A	] triterpene (camelliol)	No
V. vinifera	GSVIVG01023131001	No	#N/A	(specialized) MEP pathway	No
V. vinifera	GSVIVG01023491001	No	#N/A	(specialized) Mevalonic acid pathway	No
V. vinifera	GSVIVG01023852001	No	#N/A	(specialized) Mevalonic acid pathway	No
V. vinifera	GSVIVG01025182001	No	#N/A	(specialized) MEP pathway	No
V. vinifera	GSVIVG01026444001	No	#N/A	(specialized) Mevalonic acid pathway	No
V. vinifera	GSVIVG01029109001	Yes	#N/A	(specialized) MEP pathway	Yes
V. vinifera	GSVIVG01029112001	Yes	#N/A	(specialized) MEP pathway	Yes
V. vinifera	GSVIVG01029169001	Yes	#N/A	(specialized) MEP pathway	Yes
V. vinifera	GSVIVG01029467001	Yes	#N/A	] triterpene (cycloartenol)	No
V. vinifera	GSVIVG01029468001	Yes	#N/A	] triterpene (cycloartenol)	No
V. vinifera	GSVIVG01029470001	Yes	#N/A	] triterpene (camelliol)	No
V. vinifera	GSVIVG01029474001	Yes	#N/A	] triterpene (camelliol)	No
V. vinifera	GSVIVG01029475001	Yes	#N/A	] triterpene (camelliol)	No
V. vinifera	GSVIVG01029481001	Yes	#N/A	] triterpene (camelliol)	No
V. vinifera	GSVIVG01029482001	Yes	#N/A	] triterpene (camelliol)	No
V. vinifera	GSVIVG01029485001	Yes	#N/A	] triterpene (camelliol)	No
V. vinifera	GSVIVG01029487001	Yes	#N/A	] triterpene (camelliol)	No
V. vinifera	GSVIVG01029488001	Yes	#N/A	] triterpene (camelliol)	No
V. vinifera	GSVIVG01029489001	Yes	#N/A	] triterpene (camelliol)	No
V. vinifera	GSVIVG01029490001	Yes	#N/A	] triterpene (camelliol)	No
V. vinifera	GSVIVG01029491001	Yes	#N/A	] triterpene (camelliol)	No
V. vinifera	GSVIVG01029502001	Yes	#N/A	] triterpene (camelliol)	No
V. vinifera	GSVIVG01029503001	Yes	#N/A	] triterpene (camelliol)	No
V. vinifera	GSVIVG01029507001	Yes	#N/A	] triterpene (cycloartenol)	No
V. vinifera	GSVIVG01029508001	Yes	#N/A	] triterpene (camelliol)	No
V. vinifera	GSVIVG01029509001	Yes	#N/A	] triterpene (camelliol)	No
V. vinifera	GSVIVG01029510001	Yes	#N/A	] triterpene (camelliol)	No
V. vinifera	GSVIVG01029511001	Yes	#N/A	] triterpene (cycloartenol)	No
V. vinifera	GSVIVG01029514001	Yes	#N/A	] triterpene (cycloartenol)	No
V. vinifera	GSVIVG01029518001	Yes	#N/A	] triterpene (camelliol)	No
V. vinifera	GSVIVG01029520001	Yes	#N/A	] triterpene (camelliol)	No
V. vinifera	GSVIVG01029523001	Yes	#N/A	] triterpene (camelliol)	No
V. vinifera	GSVIVG01029524001	Yes	#N/A	] triterpene (cycloartenol)	No
V. vinifera	GSVIVG01029525001	Yes	#N/A	] triterpene (cycloartenol)	No
V. vinifera	GSVIVG01029527001	Yes	#N/A	] triterpene (cycloartenol)	No
V. vinifera	GSVIVG01030112001	No	#N/A	(specialized) Mevalonic acid pathway	No
V. vinifera	GSVIVG01030646001	Yes	#N/A	core TPS	No
V. vinifera	GSVIVG01030647001	Yes	#N/A	core TPS	No
V. vinifera	GSVIVG01031908001	No	#N/A	(specialized) MEP pathway	No
V. vinifera	GSVIVG01032217001	No	#N/A	] triterpene (cycloartenol)	No
V. vinifera	GSVIVG01032285001	No	#N/A	] triterpene (cycloartenol)	No
V. vinifera	GSVIVG01033458001	No	#N/A	core TPS	No
V. vinifera	GSVIVG01035579001	Yes	#N/A	] triterpene (camelliol)	No
V. vinifera	GSVIVG01035580001	Yes	#N/A	] triterpene (camelliol)	No
V. vinifera	GSVIVG01035581001	Yes	#N/A	] triterpene (camelliol)	No
V. vinifera	GSVIVG01035582001	Yes	#N/A	] triterpene (camelliol)	No
V. vinifera	GSVIVG01035799001	No	#N/A	(specialized) MEP pathway	Yes
V. vinifera	GSVIVG01036307001	Yes	#N/A	core TPS	No
V. vinifera	GSVIVG01036308001	Yes	#N/A	core TPS	No
V. vinifera	GSVIVG01036310001	Yes	#N/A	core TPS	No
V. vinifera	GSVIVG01036311001	Yes	#N/A	core TPS	No
V. vinifera	GSVIVG01036312001	Yes	#N/A	core TPS	No
V. vinifera	GSVIVG01036313001	Yes	#N/A	core TPS	No
V. vinifera	GSVIVG01036315001	Yes	#N/A	core TPS	No
V. vinifera	GSVIVG01036317001	Yes	#N/A	core TPS	No
V. vinifera	GSVIVG01036318001	Yes	#N/A	core TPS	No
V. vinifera	GSVIVG01036320001	Yes	#N/A	core TPS	No
V. vinifera	GSVIVG01036321001	Yes	#N/A	core TPS	No
V. vinifera	GSVIVG01036322001	Yes	#N/A	core TPS	No
V. vinifera	GSVIVG01036325001	Yes	#N/A	core TPS	No
V. vinifera	GSVIVG01036327001	Yes	#N/A	core TPS	No
V. vinifera	GSVIVG01036328001	Yes	#N/A	core TPS	No
V. vinifera	GSVIVG01036330001	Yes	#N/A	core TPS	No
V. vinifera	GSVIVG01036331001	Yes	#N/A	core TPS	No
V. vinifera	GSVIVG01036332001	Yes	#N/A	core TPS	No
V. vinifera	GSVIVG01036333001	Yes	#N/A	core TPS	No
V. vinifera	GSVIVG01036338001	Yes	#N/A	core TPS	No
V. vinifera	GSVIVG01036339001	Yes	#N/A	core TPS	No
V. vinifera	GSVIVG01036340001	Yes	#N/A	core TPS	No
V. vinifera	GSVIVG01036343001	Yes	#N/A	core TPS	No
V. vinifera	GSVIVG01036344001	Yes	#N/A	core TPS	No
V. vinifera	GSVIVG01036345001	Yes	#N/A	core TPS	No
V. vinifera	GSVIVG01036346001	Yes	#N/A	core TPS	No
V. vinifera	GSVIVG01036348001	Yes	#N/A	core TPS	No
V. vinifera	GSVIVG01036351001	Yes	#N/A	core TPS	No
V. vinifera	GSVIVG01036352001	Yes	#N/A	core TPS	No
V. vinifera	GSVIVG01036360001	Yes	#N/A	core TPS	No
V. vinifera	GSVIVG01036361001	Yes	#N/A	core TPS	No
V. vinifera	GSVIVG01036364001	Yes	#N/A	core TPS	No
V. vinifera	GSVIVG01036366001	Yes	#N/A	core TPS	No
V. vinifera	GSVIVG01036367001	Yes	#N/A	core TPS	No
V. vinifera	GSVIVG01036368001	Yes	#N/A	core TPS	No
V. vinifera	GSVIVG01036370001	Yes	#N/A	core TPS	No
V. vinifera	GSVIVG01036371001	Yes	#N/A	core TPS	No
V. vinifera	GSVIVG01036372001	Yes	#N/A	core TPS	No
V. vinifera	GSVIVG01036373001	Yes	#N/A	core TPS	No
V. vinifera	GSVIVG01036374001	Yes	#N/A	core TPS	No
V. vinifera	GSVIVG01036375001	Yes	#N/A	core TPS	No
V. vinifera	GSVIVG01036376001	Yes	#N/A	core TPS	No
V. vinifera	GSVIVG01036724001	No	#N/A	core TPS	No
V. vinifera	GSVIVG01037163001	Yes	#N/A	(specialized) Mevalonic acid pathway	No
V. vinifera	GSVIVG01037164001	Yes	#N/A	(specialized) Mevalonic acid pathway	No
V. vinifera	GSVIVG01037168001	Yes	#N/A	(specialized) Mevalonic acid pathway	No
V. vinifera	GSVIVG01037169001	Yes	#N/A	(specialized) Mevalonic acid pathway	No
V. vinifera	GSVIVG01037382001	No	#N/A	(specialized) MEP pathway	No
N. benthamiana	NbC23429524g0001.1	No	#N/A	core TPS	No
N. benthamiana	NbC24530701g0001.1	No	#N/A	core TPS	No
N. benthamiana	NbC24653347g0001.1	No	#N/A	core TPS	No
N. benthamiana	NbC24754989g0004.1	No	#N/A	core TPS	No
N. benthamiana	NbS00000284g0002.1	No	#N/A	(specialized) Mevalonic acid pathway	No
N. benthamiana	NbS00000361g0009.1	Yes	#N/A	core TPS	No
N. benthamiana	NbS00000361g0010.1	Yes	#N/A	core TPS	No
N. benthamiana	NbS00000408g0001.1	No	#N/A	(specialized) IPP Isomerase	No
N. benthamiana	NbS00000653g0003.1	No	#N/A	(specialized) Mevalonic acid pathway	No
N. benthamiana	NbS00000683g0008.1	No	#N/A	(specialized) Prenyltransferase	No
N. benthamiana	NbS00000781g0016.1	No	#N/A	(specialized) IPP Isomerase	No
N. benthamiana	NbS00000908g0003.1	No	#N/A	(specialized) Prenyltransferase	No
N. benthamiana	NbS00001016g0002.1	No	#N/A	core TPS	No
N. benthamiana	NbS00001318g0007.1	Yes	#N/A	core TPS	No
N. benthamiana	NbS00001318g0009.1	Yes	#N/A	core TPS	No
N. benthamiana	NbS00001900g0005.1	No	#N/A	(specialized) Mevalonic acid pathway	No
N. benthamiana	NbS00002366g0001.1	No	#N/A	(specialized) Prenyltransferase	No
N. benthamiana	NbS00002744g0108.1	No	#N/A	(specialized) Mevalonic acid pathway	No
N. benthamiana	NbS00002759g0010.1	No	#N/A	core TPS	No
N. benthamiana	NbS00002795g0214.1	No	#N/A	(specialized) Mevalonic acid pathway	No
N. benthamiana	NbS00002915g0011.1	No	#N/A	core TPS	No
N. benthamiana	NbS00004391g0021.1	No	#N/A	core TPS	No
N. benthamiana	NbS00004447g0003.1	Yes	#N/A	core TPS	No
N. benthamiana	NbS00004447g0101.1	Yes	#N/A	core TPS	No
N. benthamiana	NbS00004799g0014.1	No	#N/A	(specialized) Mevalonic acid pathway	No
N. benthamiana	NbS00005088g0007.1	No	#N/A	core TPS	No
N. benthamiana	NbS00005104g0030.1	No	#N/A	core TPS	No
N. benthamiana	NbS00005287g0002.1	No	#N/A	(specialized) MEP pathway	Yes
N. benthamiana	NbS00005352g0004.1	No	#N/A	(specialized) MEP pathway	No
N. benthamiana	NbS00005753g0002.1	No	#N/A	] triterpene (squalene)	No
N. benthamiana	NbS00006511g0127.1	No	#N/A	(specialized) Prenyltransferase	No
N. benthamiana	NbS00007111g0015.1	No	#N/A	(specialized) Mevalonic acid pathway	No
N. benthamiana	NbS00007448g0006.1	No	#N/A	core TPS	No
N. benthamiana	NbS00007709g0207.1	No	#N/A	(specialized) MEP pathway	Yes
N. benthamiana	NbS00007783g0007.1	No	#N/A	(specialized) IPP Isomerase	No
N. benthamiana	NbS00007974g0009.1	No	#N/A	core TPS	No
N. benthamiana	NbS00008217g0018.1	No	#N/A	(specialized) MEP pathway	No
N. benthamiana	NbS00008360g0001.1	Yes	#N/A	(specialized) Prenyltransferase	No
N. benthamiana	NbS00008360g0003.1	Yes	#N/A	(specialized) Prenyltransferase	No
N. benthamiana	NbS00008422g0117.1	Yes	#N/A	core TPS	No
N. benthamiana	NbS00008422g0118.1	Yes	#N/A	core TPS	No
N. benthamiana	NbS00008452g0111.1	No	#N/A	core TPS	No
N. benthamiana	NbS00008868g0011.1	No	#N/A	(specialized) Mevalonic acid pathway	No
N. benthamiana	NbS00009003g0109.1	No	#N/A	core TPS	No
N. benthamiana	NbS00009452g0004.1	No	#N/A	core TPS	No
N. benthamiana	NbS00009504g0008.1	No	#N/A	(specialized) MEP pathway	Yes
N. benthamiana	NbS00009848g0002.1	No	#N/A	core TPS	No
N. benthamiana	NbS00010066g0036.1	Yes	#N/A	(specialized) MEP pathway	No
N. benthamiana	NbS00010066g0037.1	Yes	#N/A	(specialized) MEP pathway	No
N. benthamiana	NbS00010074g0018.1	No	#N/A	(specialized) MEP pathway	Yes
N. benthamiana	NbS00010115g0007.1	No	#N/A	(specialized) Mevalonic acid pathway	No
N. benthamiana	NbS00010838g0009.1	No	#N/A	core TPS	No
N. benthamiana	NbS00011481g0030.1	No	#N/A	(specialized) Prenyltransferase	No
N. benthamiana	NbS00011561g0006.1	No	#N/A	(specialized) MEP pathway	Yes
N. benthamiana	NbS00012715g0004.1	No	#N/A	(specialized) Prenyltransferase	No
N. benthamiana	NbS00012865g0002.1	No	#N/A	(specialized) MEP pathway	No
N. benthamiana	NbS00013099g0001.1	No	#N/A	(specialized) Prenyltransferase	No
N. benthamiana	NbS00013191g0001.1	No	#N/A	(specialized) Prenyltransferase	No
N. benthamiana	NbS00013540g0003.1	Yes	#N/A	core TPS	No
N. benthamiana	NbS00013540g0011.1	Yes	#N/A	core TPS	No
N. benthamiana	NbS00013770g0009.1	No	#N/A	(specialized) MEP pathway	No
N. benthamiana	NbS00014693g0012.1	No	#N/A	core TPS	No
N. benthamiana	NbS00014845g0012.1	No	#N/A	(specialized) Prenyltransferase	No
N. benthamiana	NbS00014906g0005.1	No	#N/A	(specialized) Mevalonic acid pathway	No
N. benthamiana	NbS00014930g0013.1	No	#N/A	(specialized) MEP pathway	No
N. benthamiana	NbS00015135g0014.1	No	#N/A	(specialized) Mevalonic acid pathway	No
N. benthamiana	NbS00015612g0003.1	No	#N/A	(specialized) MEP pathway	No
N. benthamiana	NbS00015675g0028.1	Yes	#N/A	core TPS	No
N. benthamiana	NbS00016675g0008.1	Yes	#N/A	(specialized) Mevalonic acid pathway	No
N. benthamiana	NbS00016720g0016.1	No	#N/A	core TPS	No
N. benthamiana	NbS00016810g0001.1	No	#N/A	core TPS	No
N. benthamiana	NbS00017162g0020.1	No	#N/A	(specialized) Mevalonic acid pathway	No
N. benthamiana	NbS00017634g0003.1	No	#N/A	(specialized) MEP pathway	Yes
N. benthamiana	NbS00017744g0004.1	No	#N/A	(specialized) Mevalonic acid pathway	No
N. benthamiana	NbS00017912g0014.1	No	#N/A	(specialized) Mevalonic acid pathway	No
N. benthamiana	NbS00018220g0004.1	No	#N/A	core TPS	No
N. benthamiana	NbS00018470g0007.1	No	#N/A	core TPS	No
N. benthamiana	NbS00018743g0012.1	No	#N/A	(specialized) Mevalonic acid pathway	No
N. benthamiana	NbS00018954g0001.1	No	#N/A	core TPS	No
N. benthamiana	NbS00019611g0022.1	No	#N/A	core TPS	No
N. benthamiana	NbS00019825g0007.1	Yes	#N/A	] triterpene (cycloartenol)	No
N. benthamiana	NbS00019825g0010.1	Yes	#N/A	] triterpene (camelliol)	No
N. benthamiana	NbS00020250g0007.1	No	#N/A	core TPS	No
N. benthamiana	NbS00020403g0003.1	No	#N/A	core TPS	No
N. benthamiana	NbS00021029g0013.1	No	#N/A	] triterpene (cycloartenol)	No
N. benthamiana	NbS00021118g0003.1	No	#N/A	(specialized) Mevalonic acid pathway	No
N. benthamiana	NbS00021306g0010.1	No	#N/A	core TPS	No
N. benthamiana	NbS00021906g0006.1	No	#N/A	core TPS	No
N. benthamiana	NbS00022436g0017.1	Yes	#N/A	core TPS	No
N. benthamiana	NbS00022436g0019.1	Yes	#N/A	core TPS	No
N. benthamiana	NbS00022628g0012.1	No	#N/A	core TPS	No
N. benthamiana	NbS00022671g0001.1	Yes	#N/A	core TPS	No
N. benthamiana	NbS00022671g0015.1	Yes	#N/A	core TPS	No
N. benthamiana	NbS00022671g0017.1	Yes	#N/A	core TPS	No
N. benthamiana	NbS00023398g0009.1	No	#N/A	(specialized) Mevalonic acid pathway	No
N. benthamiana	NbS00023487g0001.1	No	#N/A	core TPS	No
N. benthamiana	NbS00023618g0010.1	No	#N/A	(specialized) Mevalonic acid pathway	No
N. benthamiana	NbS00023720g0012.1	No	#N/A	] triterpene (camelliol)	No
N. benthamiana	NbS00025554g0005.1	No	#N/A	core TPS	No
N. benthamiana	NbS00026057g0001.1	No	#N/A	(specialized) Prenyltransferase	No
N. benthamiana	NbS00026522g0004.1	No	#N/A	core TPS	No
N. benthamiana	NbS00026802g0012.1	No	#N/A	(specialized) Mevalonic acid pathway	No
N. benthamiana	NbS00027281g0006.1	Yes	#N/A	core TPS	No
N. benthamiana	NbS00027281g0007.1	Yes	#N/A	core TPS	No
N. benthamiana	NbS00027281g0008.1	Yes	#N/A	core TPS	No
N. benthamiana	NbS00027734g0004.1	No	#N/A	] triterpene (camelliol)	No
N. benthamiana	NbS00029128g0012.1	No	#N/A	core TPS	No
N. benthamiana	NbS00029252g0012.1	No	#N/A	(specialized) Prenyltransferase	No
N. benthamiana	NbS00029423g0004.1	No	#N/A	core TPS	No
N. benthamiana	NbS00029794g0006.1	Yes	#N/A	] triterpene (cycloartenol)	No
N. benthamiana	NbS00029794g0007.1	Yes	#N/A	] triterpene (cycloartenol)	No
N. benthamiana	NbS00030084g0006.1	No	#N/A	(specialized) MEP pathway	Yes
N. benthamiana	NbS00031242g0106.1	Yes	#N/A	core TPS	No
N. benthamiana	NbS00031242g0107.1	Yes	#N/A	core TPS	No
N. benthamiana	NbS00031559g0010.1	No	#N/A	core TPS	No
N. benthamiana	NbS00032579g0011.1	No	#N/A	(specialized) Prenyltransferase	No
N. benthamiana	NbS00032731g0008.1	No	#N/A	(specialized) Prenyltransferase	No
N. benthamiana	NbS00033034g0004.1	No	#N/A	core TPS	No
N. benthamiana	NbS00033121g0032.1	No	#N/A	(specialized) Mevalonic acid pathway	No
N. benthamiana	NbS00033364g0013.1	No	#N/A	(specialized) Prenyltransferase	No
N. benthamiana	NbS00034505g0004.1	No	#N/A	(specialized) Mevalonic acid pathway	No
N. benthamiana	NbS00035118g0001.1	No	#N/A	(specialized) IPP Isomerase	No
N. benthamiana	NbS00035392g0013.1	No	#N/A	(specialized) MEP pathway	Yes
N. benthamiana	NbS00036186g0011.1	No	#N/A	core TPS	No
N. benthamiana	NbS00036873g0005.1	No	#N/A	core TPS	No
N. benthamiana	NbS00037410g0003.1	No	#N/A	core TPS	No
N. benthamiana	NbS00037540g0010.1	No	#N/A	(specialized) MEP pathway	No
N. benthamiana	NbS00038367g0003.1	Yes	#N/A	] triterpene (squalene)	No
N. benthamiana	NbS00038367g0005.1	Yes	#N/A	] triterpene (squalene)	No
N. benthamiana	NbS00038519g0005.1	No	#N/A	(specialized) Mevalonic acid pathway	No
N. benthamiana	NbS00040074g0013.1	No	#N/A	(specialized) Mevalonic acid pathway	No
N. benthamiana	NbS00041597g0002.1	No	#N/A	core TPS	No
N. benthamiana	NbS00041716g0004.1	No	#N/A	] triterpene (camelliol)	No
N. benthamiana	NbS00041813g0003.1	No	#N/A	] triterpene (camelliol)	No
N. benthamiana	NbS00041927g0001.1	Yes	#N/A	core TPS	No
N. benthamiana	NbS00041927g0007.1	Yes	#N/A	core TPS	No
N. benthamiana	NbS00041927g0008.1	Yes	#N/A	core TPS	No
N. benthamiana	NbS00044290g0001.1	Yes	#N/A	core TPS	No
N. benthamiana	NbS00044290g0010.1	Yes	#N/A	core TPS	No
N. benthamiana	NbS00044290g0014.1	Yes	#N/A	core TPS	No
N. benthamiana	NbS00046841g0002.1	No	#N/A	core TPS	No
N. benthamiana	NbS00047838g0016.1	No	#N/A	(specialized) MEP pathway	No
N. benthamiana	NbS00048654g0004.1	No	#N/A	core TPS	No
N. benthamiana	NbS00050019g0004.1	No	#N/A	core TPS	No
N. benthamiana	NbS00050703g0009.1	No	#N/A	(specialized) MEP pathway	No
N. benthamiana	NbS00051098g0007.1	No	#N/A	(specialized) MEP pathway	No
N. benthamiana	NbS00051462g0004.1	No	#N/A	core TPS	No
N. benthamiana	NbS00051550g0004.1	No	#N/A	(specialized) MEP pathway	No
N. benthamiana	NbS00053226g0006.1	No	#N/A	] triterpene (cycloartenol)	No
N. benthamiana	NbS00053311g0017.1	No	#N/A	(specialized) MEP pathway	No
N. benthamiana	NbS00053528g0006.1	Yes	#N/A	core TPS	No
N. benthamiana	NbS00053528g0012.1	Yes	#N/A	core TPS	No
N. benthamiana	NbS00054069g0006.1	No	#N/A	core TPS	No
N. benthamiana	NbS00054905g0002.1	No	#N/A	(specialized) MEP pathway	Yes
N. benthamiana	NbS00055038g0012.1	No	#N/A	(specialized) Prenyltransferase	No
N. benthamiana	NbS00055581g0001.1	No	#N/A	core TPS	No
N. benthamiana	NbS00055951g0003.1	No	#N/A	(specialized) Mevalonic acid pathway	No
N. benthamiana	NbS00057467g0005.1	No	#N/A	(specialized) Mevalonic acid pathway	No
N. benthamiana	NbS00058620g0003.1	No	#N/A	(specialized) Prenyltransferase	No
N. benthamiana	NbS00058715g0009.1	No	#N/A	core TPS	No
N. benthamiana	NbS00061461g0006.1	No	#N/A	] triterpene (camelliol)	No
C. sinensis	orange1.1g003417m	No	#N/A	core TPS	No
C. sinensis	orange1.1g003948m	Yes	#N/A	(specialized) MEP pathway	Yes
C. sinensis	orange1.1g004193m	No	#N/A	core TPS	No
C. sinensis	orange1.1g004634m	No	#N/A	(specialized) MEP pathway	No
C. sinensis	orange1.1g004923m	Yes	#N/A	(specialized) MEP pathway	Yes
C. sinensis	orange1.1g004946m	No	#N/A	(specialized) MEP pathway	Yes
C. sinensis	orange1.1g006042m	No	#N/A	] triterpene (camelliol)	No
C. sinensis	orange1.1g006994m	Yes	#N/A	core TPS	No
C. sinensis	orange1.1g007889m	Yes	Yes	core TPS	No
C. sinensis	orange1.1g007956m	No	#N/A	(specialized) Mevalonic acid pathway	No
C. sinensis	orange1.1g008206m	Yes	#N/A	core TPS	No
C. sinensis	orange1.1g008427m	No	#N/A	core TPS	No
C. sinensis	orange1.1g008620m	No	#N/A	core TPS	No
C. sinensis	orange1.1g008767m	Yes	#N/A	core TPS	No
C. sinensis	orange1.1g008817m	Yes	#N/A	core TPS	No
C. sinensis	orange1.1g010631m	Yes	#N/A	] triterpene (cycloartenol)	No
C. sinensis	orange1.1g011423m	Yes	#N/A	(specialized) Mevalonic acid pathway	No
C. sinensis	orange1.1g011444m	No	#N/A	core TPS	No
C. sinensis	orange1.1g012004m	Yes	#N/A	(specialized) MEP pathway	No
C. sinensis	orange1.1g012005m	Yes	#N/A	core TPS	No
C. sinensis	orange1.1g012253m	Yes	Yes	(specialized) Mevalonic acid pathway	No
C. sinensis	orange1.1g012353m	Yes	Yes	(specialized) Mevalonic acid pathway	No
C. sinensis	orange1.1g013834m	No	#N/A	(specialized) Mevalonic acid pathway	No
C. sinensis	orange1.1g014206m	No	#N/A	core TPS	No
C. sinensis	orange1.1g014276m	Yes	#N/A	(specialized) Prenyltransferase	No
C. sinensis	orange1.1g014714m	Yes	#N/A	(specialized) Mevalonic acid pathway	No
C. sinensis	orange1.1g015003m	Yes	#N/A	(specialized) Mevalonic acid pathway	No
C. sinensis	orange1.1g015245m	Yes	#N/A	core TPS	No
C. sinensis	orange1.1g015495m	No	#N/A	(specialized) Mevalonic acid pathway	No
C. sinensis	orange1.1g016716m	No	#N/A	(specialized) MEP pathway	No
C. sinensis	orange1.1g016939m	Yes	#N/A	(specialized) MEP pathway	No
C. sinensis	orange1.1g018156m	No	#N/A	(specialized) Prenyltransferase	No
C. sinensis	orange1.1g019339m	Yes	#N/A	(specialized) Prenyltransferase	No
C. sinensis	orange1.1g019903m	No	#N/A	(specialized) Prenyltransferase	No
C. sinensis	orange1.1g019916m	No	#N/A	core TPS	No
C. sinensis	orange1.1g020845m	No	#N/A	(specialized) Prenyltransferase	No
C. sinensis	orange1.1g020852m	Yes	#N/A	] triterpene (camelliol)	No
C. sinensis	orange1.1g021595m	Yes	#N/A	core TPS	No
C. sinensis	orange1.1g021668m	No	#N/A	(specialized) Prenyltransferase	No
C. sinensis	orange1.1g022053m	Yes	#N/A	(specialized) IPP Isomerase	No
C. sinensis	orange1.1g022166m	No	#N/A	] triterpene (squalene)	No
C. sinensis	orange1.1g022657m	Yes	#N/A	(specialized) MEP pathway	No
C. sinensis	orange1.1g024239m	No	#N/A	(specialized) Prenyltransferase	No
C. sinensis	orange1.1g024780m	Yes	#N/A	core TPS	No
C. sinensis	orange1.1g025046m	No	#N/A	core TPS	No
C. sinensis	orange1.1g025080m	No	#N/A	core TPS	No
C. sinensis	orange1.1g026400m	Yes	#N/A	] triterpene (camelliol)	No
C. sinensis	orange1.1g026485m	Yes	#N/A	] triterpene (camelliol)	No
C. sinensis	orange1.1g026508m	Yes	#N/A	(specialized) MEP pathway	No
C. sinensis	orange1.1g027637m	Yes	#N/A	core TPS	No
C. sinensis	orange1.1g028006m	No	#N/A	core TPS	No
C. sinensis	orange1.1g029692m	No	#N/A	] triterpene (camelliol)	No
C. sinensis	orange1.1g030682m	No	#N/A	core TPS	No
C. sinensis	orange1.1g031897m	No	#N/A	] triterpene (camelliol)	No
C. sinensis	orange1.1g032926m	No	#N/A	core TPS	No
C. sinensis	orange1.1g035568m	Yes	#N/A	core TPS	No
C. sinensis	orange1.1g035819m	Yes	#N/A	core TPS	No
C. sinensis	orange1.1g036967m	No	#N/A	core TPS	No
C. sinensis	orange1.1g037064m	No	#N/A	(specialized) MEP pathway	No
C. sinensis	orange1.1g037321m	No	#N/A	core TPS	No
C. sinensis	orange1.1g037594m	No	#N/A	(specialized) Prenyltransferase	No
C. sinensis	orange1.1g037716m	Yes	#N/A	(specialized) Prenyltransferase	No
C. sinensis	orange1.1g038162m	No	#N/A	core TPS	No
C. sinensis	orange1.1g038218m	No	#N/A	core TPS	No
C. sinensis	orange1.1g038404m	No	#N/A	(specialized) Prenyltransferase	No
C. sinensis	orange1.1g038854m	No	#N/A	(specialized) Prenyltransferase	No
C. sinensis	orange1.1g038873m	No	#N/A	] triterpene (cycloartenol)	No
C. sinensis	orange1.1g039084m	No	#N/A	core TPS	No
C. sinensis	orange1.1g039153m	No	#N/A	core TPS	No
C. sinensis	orange1.1g039366m	No	#N/A	core TPS	No
C. sinensis	orange1.1g039627m	No	#N/A	] triterpene (camelliol)	No
C. sinensis	orange1.1g040006m	No	#N/A	core TPS	No
C. sinensis	orange1.1g040035m	Yes	#N/A	] triterpene (camelliol)	No
C. sinensis	orange1.1g040042m	Yes	#N/A	core TPS	No
C. sinensis	orange1.1g040521m	No	#N/A	core TPS	No
C. sinensis	orange1.1g040645m	No	#N/A	core TPS	No
C. sinensis	orange1.1g040690m	No	#N/A	(specialized) MEP pathway	No
C. sinensis	orange1.1g040856m	Yes	#N/A	core TPS	No
C. sinensis	orange1.1g041265m	No	#N/A	(specialized) MEP pathway	Yes
C. sinensis	orange1.1g041361m	No	#N/A	core TPS	No
C. sinensis	orange1.1g041457m	Yes	#N/A	core TPS	No
C. sinensis	orange1.1g041613m	Yes	#N/A	core TPS	No
C. sinensis	orange1.1g041642m	No	#N/A	core TPS	No
C. sinensis	orange1.1g041900m	No	#N/A	core TPS	No
C. sinensis	orange1.1g041926m	No	#N/A	core TPS	No
C. sinensis	orange1.1g042175m	No	#N/A	(specialized) Prenyltransferase	No
C. sinensis	orange1.1g043404m	Yes	#N/A	core TPS	No
C. sinensis	orange1.1g043649m	No	#N/A	core TPS	No
C. sinensis	orange1.1g043754m	No	#N/A	core TPS	No
C. sinensis	orange1.1g043877m	No	#N/A	] triterpene (camelliol)	No
C. sinensis	orange1.1g043885m	No	#N/A	] triterpene (cycloartenol)	No
C. sinensis	orange1.1g044224m	Yes	Yes	core TPS	No
C. sinensis	orange1.1g044313m	No	#N/A	] triterpene (camelliol)	No
C. sinensis	orange1.1g044370m	No	#N/A	core TPS	No
C. sinensis	orange1.1g044462m	Yes	#N/A	core TPS	No
C. sinensis	orange1.1g044478m	Yes	#N/A	core TPS	No
C. sinensis	orange1.1g044511m	No	#N/A	core TPS	No
C. sinensis	orange1.1g044570m	Yes	#N/A	core TPS	No
C. sinensis	orange1.1g044890m	No	#N/A	core TPS	No
C. sinensis	orange1.1g045043m	Yes	#N/A	core TPS	No
C. sinensis	orange1.1g045151m	No	#N/A	(specialized) Mevalonic acid pathway	No
C. sinensis	orange1.1g045169m	No	#N/A	core TPS	No
C. sinensis	orange1.1g045533m	No	#N/A	core TPS	No
C. sinensis	orange1.1g045966m	No	#N/A	core TPS	No
C. sinensis	orange1.1g046807m	No	#N/A	core TPS	No
C. sinensis	orange1.1g046854m	Yes	#N/A	] triterpene (unknown)	No
C. sinensis	orange1.1g046913m	No	#N/A	core TPS	No
C. sinensis	orange1.1g047694m	No	#N/A	core TPS	No
C. sinensis	orange1.1g047877m	Yes	#N/A	core TPS	No
C. sinensis	orange1.1g048049m	Yes	#N/A	] triterpene (unknown)	No
C. sinensis	orange1.1g048051m	Yes	#N/A	core TPS	No
C. sinensis	orange1.1g048111m	No	#N/A	core TPS	No
C. sinensis	orange1.1g048260m	No	#N/A	] triterpene (camelliol)	No
C. sinensis	orange1.1g048279m	No	#N/A	] triterpene (cycloartenol)	No
C. sinensis	orange1.1g048325m	No	#N/A	core TPS	No
C. sinensis	orange1.1g048429m	No	#N/A	core TPS	No
C. sinensis	orange1.1g048547m	No	#N/A	core TPS	No
C. sinensis	orange1.1g048587m	No	#N/A	] triterpene (camelliol)	No
S. tuberosum	PGSC0003DMP400003409	No	#N/A	core TPS	No
S. tuberosum	PGSC0003DMP400003484	No	#N/A	core TPS	No
S. tuberosum	PGSC0003DMP400004817	No	#N/A	(specialized) Prenyltransferase	No
S. tuberosum	PGSC0003DMP400005429	No	#N/A	core TPS	No
S. tuberosum	PGSC0003DMP400006164	No	#N/A	(specialized) Mevalonic acid pathway	No
S. tuberosum	PGSC0003DMP400007565	No	Yes	(specialized) Mevalonic acid pathway	No
S. tuberosum	PGSC0003DMP400008965	No	#N/A	core TPS	No
S. tuberosum	PGSC0003DMP400009841	Yes	#N/A	core TPS	No
S. tuberosum	PGSC0003DMP400009851	Yes	#N/A	core TPS	No
S. tuberosum	PGSC0003DMP400009855	Yes	#N/A	core TPS	No
S. tuberosum	PGSC0003DMP400011091	No	#N/A	core TPS	No
S. tuberosum	PGSC0003DMP400011840	No	#N/A	core TPS	No
S. tuberosum	PGSC0003DMP400011868	No	#N/A	core TPS	No
S. tuberosum	PGSC0003DMP400012883	No	#N/A	(specialized) IPP Isomerase	No
S. tuberosum	PGSC0003DMP400014162	No	#N/A	(specialized) MEP pathway	No
S. tuberosum	PGSC0003DMP400015280	No	#N/A	(specialized) Prenyltransferase	No
S. tuberosum	PGSC0003DMP400016447	No	#N/A	(specialized) Mevalonic acid pathway	No
S. tuberosum	PGSC0003DMP400017350	No	#N/A	core TPS	No
S. tuberosum	PGSC0003DMP400017516	No	Yes	(specialized) Mevalonic acid pathway	No
S. tuberosum	PGSC0003DMP400018716	Yes	#N/A	core TPS	No
S. tuberosum	PGSC0003DMP400018717	Yes	#N/A	core TPS	No
S. tuberosum	PGSC0003DMP400018722	Yes	#N/A	core TPS	No
S. tuberosum	PGSC0003DMP400019263	No	#N/A	(specialized) Mevalonic acid pathway	No
S. tuberosum	PGSC0003DMP400019916	Yes	Yes	core TPS	No
S. tuberosum	PGSC0003DMP400019917	Yes	#N/A	core TPS	No
S. tuberosum	PGSC0003DMP400019918	Yes	#N/A	core TPS	No
S. tuberosum	PGSC0003DMP400019978	No	#N/A	core TPS	No
S. tuberosum	PGSC0003DMP400020868	Yes	#N/A	core TPS	No
S. tuberosum	PGSC0003DMP400020871	Yes	#N/A	core TPS	No
S. tuberosum	PGSC0003DMP400020890	No	#N/A	core TPS	No
S. tuberosum	PGSC0003DMP400021116	Yes	#N/A	(specialized) Mevalonic acid pathway	No
S. tuberosum	PGSC0003DMP400021120	Yes	#N/A	(specialized) Mevalonic acid pathway	No
S. tuberosum	PGSC0003DMP400021537	No	#N/A	(specialized) MEP pathway	No
S. tuberosum	PGSC0003DMP400022129	No	#N/A	] triterpene (squalene)	No
S. tuberosum	PGSC0003DMP400022158	No	Yes	(specialized) Mevalonic acid pathway	No
S. tuberosum	PGSC0003DMP400022653	No	#N/A	core TPS	No
S. tuberosum	PGSC0003DMP400022809	No	#N/A	core TPS	No
S. tuberosum	PGSC0003DMP400023094	Yes	#N/A	core TPS	No
S. tuberosum	PGSC0003DMP400023095	Yes	#N/A	core TPS	No
S. tuberosum	PGSC0003DMP400023389	No	#N/A	core TPS	No
S. tuberosum	PGSC0003DMP400023973	No	#N/A	] triterpene (camelliol)	No
S. tuberosum	PGSC0003DMP400024174	No	#N/A	(specialized) Mevalonic acid pathway	No
S. tuberosum	PGSC0003DMP400025294	No	#N/A	(specialized) Prenyltransferase	No
S. tuberosum	PGSC0003DMP400026418	No	#N/A	core TPS	No
S. tuberosum	PGSC0003DMP400027464	No	#N/A	(specialized) Prenyltransferase	No
S. tuberosum	PGSC0003DMP400028020	No	#N/A	(specialized) Mevalonic acid pathway	No
S. tuberosum	PGSC0003DMP400028160	No	#N/A	(specialized) MEP pathway	Yes
S. tuberosum	PGSC0003DMP400029541	No	#N/A	core TPS	No
S. tuberosum	PGSC0003DMP400029830	No	#N/A	] triterpene (camelliol)	No
S. tuberosum	PGSC0003DMP400030353	No	#N/A	(specialized) Mevalonic acid pathway	No
S. tuberosum	PGSC0003DMP400031262	Yes	#N/A	core TPS	No
S. tuberosum	PGSC0003DMP400031263	Yes	#N/A	core TPS	No
S. tuberosum	PGSC0003DMP400031484	No	#N/A	core TPS	No
S. tuberosum	PGSC0003DMP400031730	No	#N/A	(specialized) MEP pathway	No
S. tuberosum	PGSC0003DMP400031782	No	#N/A	core TPS	No
S. tuberosum	PGSC0003DMP400031857	No	#N/A	core TPS	No
S. tuberosum	PGSC0003DMP400031872	No	#N/A	core TPS	No
S. tuberosum	PGSC0003DMP400032185	No	Yes	core TPS	No
S. tuberosum	PGSC0003DMP400032562	No	#N/A	(specialized) Mevalonic acid pathway	No
S. tuberosum	PGSC0003DMP400033007	Yes	#N/A	] triterpene (camelliol)	No
S. tuberosum	PGSC0003DMP400033008	Yes	#N/A	] triterpene (camelliol)	No
S. tuberosum	PGSC0003DMP400033018	Yes	#N/A	core TPS	No
S. tuberosum	PGSC0003DMP400034321	No	#N/A	(specialized) Mevalonic acid pathway	No
S. tuberosum	PGSC0003DMP400034358	No	#N/A	core TPS	No
S. tuberosum	PGSC0003DMP400034377	Yes	#N/A	core TPS	No
S. tuberosum	PGSC0003DMP400034378	Yes	#N/A	core TPS	No
S. tuberosum	PGSC0003DMP400034379	Yes	#N/A	core TPS	No
S. tuberosum	PGSC0003DMP400034742	No	#N/A	] triterpene (camelliol)	No
S. tuberosum	PGSC0003DMP400034762	No	#N/A	core TPS	No
S. tuberosum	PGSC0003DMP400035793	No	#N/A	core TPS	No
S. tuberosum	PGSC0003DMP400035946	No	#N/A	core TPS	No
S. tuberosum	PGSC0003DMP400036352	Yes	#N/A	core TPS	No
S. tuberosum	PGSC0003DMP400036353	Yes	#N/A	core TPS	No
S. tuberosum	PGSC0003DMP400036354	Yes	#N/A	core TPS	No
S. tuberosum	PGSC0003DMP400036394	No	#N/A	core TPS	No
S. tuberosum	PGSC0003DMP400037641	No	Yes	core TPS	No
S. tuberosum	PGSC0003DMP400037880	No	#N/A	core TPS	No
S. tuberosum	PGSC0003DMP400038220	No	#N/A	core TPS	No
S. tuberosum	PGSC0003DMP400039363	No	#N/A	(specialized) MEP pathway	No
S. tuberosum	PGSC0003DMP400039439	Yes	#N/A	(specialized) Mevalonic acid pathway	No
S. tuberosum	PGSC0003DMP400039440	Yes	Yes	(specialized) Mevalonic acid pathway	No
S. tuberosum	PGSC0003DMP400039626	No	#N/A	(specialized) MEP pathway	Yes
S. tuberosum	PGSC0003DMP400040388	No	#N/A	(specialized) IPP Isomerase	No
S. tuberosum	PGSC0003DMP400041444	No	#N/A	(specialized) Mevalonic acid pathway	No
S. tuberosum	PGSC0003DMP400041739	No	#N/A	core TPS	No
S. tuberosum	PGSC0003DMP400042238	Yes	#N/A	core TPS	No
S. tuberosum	PGSC0003DMP400042239	Yes	#N/A	core TPS	No
S. tuberosum	PGSC0003DMP400042263	Yes	#N/A	core TPS	No
S. tuberosum	PGSC0003DMP400042268	Yes	#N/A	core TPS	No
S. tuberosum	PGSC0003DMP400042381	No	#N/A	(specialized) MEP pathway	No
S. tuberosum	PGSC0003DMP400043678	No	#N/A	(specialized) MEP pathway	No
S. tuberosum	PGSC0003DMP400045622	No	#N/A	core TPS	No
S. tuberosum	PGSC0003DMP400047534	No	#N/A	core TPS	No
S. tuberosum	PGSC0003DMP400048439	No	#N/A	(specialized) Prenyltransferase	No
S. tuberosum	PGSC0003DMP400049796	No	#N/A	(specialized) Mevalonic acid pathway	No
S. tuberosum	PGSC0003DMP400049993	No	#N/A	] triterpene (cycloartenol)	No
S. tuberosum	PGSC0003DMP400050675	No	#N/A	(specialized) MEP pathway	Yes
S. tuberosum	PGSC0003DMP400050840	Yes	#N/A	core TPS	No
S. tuberosum	PGSC0003DMP400050841	Yes	#N/A	core TPS	No
S. tuberosum	PGSC0003DMP400050843	Yes	#N/A	core TPS	No
S. tuberosum	PGSC0003DMP400050846	Yes	#N/A	core TPS	No
S. tuberosum	PGSC0003DMP400050848	Yes	#N/A	core TPS	No
S. tuberosum	PGSC0003DMP400051895	No	#N/A	(specialized) Prenyltransferase	No
S. tuberosum	PGSC0003DMP400052734	No	#N/A	] triterpene (camelliol)	No
S. tuberosum	PGSC0003DMP400054115	Yes	#N/A	core TPS	No
S. tuberosum	PGSC0003DMP400054116	Yes	#N/A	core TPS	No
S. tuberosum	PGSC0003DMP400054372	Yes	#N/A	core TPS	No
S. tuberosum	PGSC0003DMP400054373	Yes	#N/A	core TPS	No
S. tuberosum	PGSC0003DMP400054741	No	#N/A	core TPS	No
S. tuberosum	PGSC0003DMP400056381	Yes	#N/A	core TPS	No
S. tuberosum	PGSC0003DMP400056382	Yes	#N/A	core TPS	No
S. tuberosum	PGSC0003DMP400056389	No	#N/A	core TPS	No
S. tuberosum	PGSC0003DMP400057289	No	#N/A	(specialized) Mevalonic acid pathway	No
S. tuberosum	PGSC0003DMP400058784	No	#N/A	(specialized) Mevalonic acid pathway	No
S. tuberosum	PGSC0003DMP400060684	No	#N/A	core TPS	No
S. tuberosum	PGSC0003DMP400061973	No	#N/A	core TPS	No
S. tuberosum	PGSC0003DMP400062193	Yes	#N/A	(specialized) Mevalonic acid pathway	No
S. tuberosum	PGSC0003DMP400062198	Yes	#N/A	core TPS	No
S. tuberosum	PGSC0003DMP400063612	No	#N/A	(specialized) Prenyltransferase	No
S. tuberosum	PGSC0003DMP400064389	No	#N/A	(specialized) Mevalonic acid pathway	No
S. tuberosum	PGSC0003DMP400065371	No	#N/A	(specialized) Prenyltransferase	No
S. tuberosum	PGSC0003DMP400065641	No	#N/A	(specialized) Mevalonic acid pathway	No
S. tuberosum	PGSC0003DMP400067199	No	#N/A	core TPS	No
S. tuberosum	PGSC0003DMP400068447	No	#N/A	(specialized) Mevalonic acid pathway	No
S. tuberosum	PGSC0003DMP400069148	No	#N/A	(specialized) Prenyltransferase	No
S. tuberosum	PGSC0003DMP400069371	No	#N/A	(specialized) Mevalonic acid pathway	No
S. bicolor	Sb01g009140	No	#N/A	(specialized) MEP pathway	No
S. bicolor	Sb01g015070	Yes	#N/A	core TPS	No
S. bicolor	Sb01g015640	Yes	#N/A	] triterpene (cycloartenol)	No
S. bicolor	Sb01g015650	Yes	#N/A	] triterpene (cycloartenol)	No
S. bicolor	Sb01g021990	No	#N/A	core TPS	No
S. bicolor	Sb01g032610	No	#N/A	core TPS	No
S. bicolor	Sb01g033360	No	#N/A	(specialized) Mevalonic acid pathway	No
S. bicolor	Sb01g034700	No	#N/A	core TPS	No
S. bicolor	Sb01g035140	No	#N/A	core TPS	No
S. bicolor	Sb01g035460	No	#N/A	core TPS	No
S. bicolor	Sb01g039090	No	#N/A	core TPS	No
S. bicolor	Sb01g040900	No	#N/A	(specialized) Mevalonic acid pathway	No
S. bicolor	Sb01g049310	No	#N/A	(specialized) Mevalonic acid pathway	No
S. bicolor	Sb02g000380	No	#N/A	core TPS	No
S. bicolor	Sb02g005380	Yes	#N/A	(specialized) MEP pathway	Yes
S. bicolor	Sb02g005410	Yes	#N/A	(specialized) MEP pathway	Yes
S. bicolor	Sb02g005490	Yes	#N/A	core TPS	No
S. bicolor	Sb02g013120	No	#N/A	] triterpene (cycloartenol)	No
S. bicolor	Sb02g028630	No	Yes	(specialized) Mevalonic acid pathway	No
S. bicolor	Sb02g030270	No	#N/A	(specialized) Mevalonic acid pathway	No
S. bicolor	Sb02g035700	No	#N/A	(specialized) IPP Isomerase	No
S. bicolor	Sb02g037510	No	#N/A	(specialized) Prenyltransferase	No
S. bicolor	Sb03g008650	No	#N/A	(specialized) MEP pathway	No
S. bicolor	Sb03g009380	No	#N/A	(specialized) Prenyltransferase	No
S. bicolor	Sb03g032280	No	Yes	(specialized) Prenyltransferase	No
S. bicolor	Sb03g037310	No	#N/A	(specialized) MEP pathway	No
S. bicolor	Sb03g041000	No	#N/A	core TPS	No
S. bicolor	Sb03g042160	No	#N/A	(specialized) MEP pathway	No
S. bicolor	Sb04g001220	No	#N/A	(specialized) Mevalonic acid pathway	No
S. bicolor	Sb04g001370	Yes	#N/A	] triterpene (cycloartenol)	No
S. bicolor	Sb04g001400	Yes	#N/A	] triterpene (lanosterol)	No
S. bicolor	Sb04g001760	Yes	#N/A	core TPS	No
S. bicolor	Sb04g001770	Yes	#N/A	core TPS	No
S. bicolor	Sb04g001780	Yes	#N/A	core TPS	No
S. bicolor	Sb04g001800	Yes	#N/A	core TPS	No
S. bicolor	Sb04g001810	Yes	#N/A	core TPS	No
S. bicolor	Sb04g003190	Yes	Yes	] triterpene (cycloartenol)	No
S. bicolor	Sb04g003200	Yes	#N/A	] triterpene (cycloartenol)	No
S. bicolor	Sb04g003210	Yes	#N/A	] triterpene (cycloartenol)	No
S. bicolor	Sb04g003300	Yes	#N/A	] triterpene (cycloartenol)	No
S. bicolor	Sb04g025290	No	#N/A	(specialized) MEP pathway	No
S. bicolor	Sb04g030030	No	Yes	(specialized) Mevalonic acid pathway	No
S. bicolor	Sb04g031830	No	#N/A	(specialized) MEP pathway	No
S. bicolor	Sb04g035950	No	#N/A	(specialized) Mevalonic acid pathway	No
S. bicolor	Sb05g006470	No	#N/A	core TPS	No
S. bicolor	Sb05g008010	Yes	#N/A	] triterpene (cycloartenol)	No
S. bicolor	Sb05g008020	Yes	#N/A	] triterpene (cycloartenol)	No
S. bicolor	Sb05g011010	Yes	#N/A	] triterpene (cycloartenol)	No
S. bicolor	Sb05g011020	Yes	#N/A	] triterpene (cycloartenol)	No
S. bicolor	Sb05g019180	Yes	#N/A	core TPS	No
S. bicolor	Sb05g019190	Yes	#N/A	core TPS	No
S. bicolor	Sb05g019210	Yes	#N/A	core TPS	No
S. bicolor	Sb05g022290	Yes	#N/A	core TPS	No
S. bicolor	Sb05g022320	Yes	#N/A	core TPS	No
S. bicolor	Sb05g022740	Yes	#N/A	] triterpene (cycloartenol)	No
S. bicolor	Sb05g022745	Yes	Yes	] triterpene (cycloartenol)	No
S. bicolor	Sb06g001020	Yes	#N/A	core TPS	No
S. bicolor	Sb06g001040	Yes	#N/A	core TPS	No
S. bicolor	Sb06g002810	Yes	#N/A	core TPS	No
S. bicolor	Sb06g002820	Yes	#N/A	core TPS	No
S. bicolor	Sb06g015950	No	#N/A	] triterpene (cycloartenol)	No
S. bicolor	Sb06g028210	Yes	#N/A	core TPS	No
S. bicolor	Sb06g028220	Yes	#N/A	core TPS	No
S. bicolor	Sb06g031270	Yes	#N/A	core TPS	No
S. bicolor	Sb06g031320	Yes	#N/A	(specialized) Prenyltransferase	No
S. bicolor	Sb07g002990	Yes	#N/A	core TPS	No
S. bicolor	Sb07g003080	Yes	#N/A	core TPS	No
S. bicolor	Sb07g003570	Yes	#N/A	] triterpene (cycloartenol)	No
S. bicolor	Sb07g003575	Yes	#N/A	] triterpene (cycloartenol)	No
S. bicolor	Sb07g004470	Yes	#N/A	core TPS	No
S. bicolor	Sb07g004480	Yes	#N/A	core TPS	No
S. bicolor	Sb07g004485	Yes	#N/A	core TPS	No
S. bicolor	Sb07g004490	Yes	#N/A	core TPS	No
S. bicolor	Sb07g005130	No	#N/A	core TPS	No
S. bicolor	Sb07g005530	No	#N/A	(specialized) Prenyltransferase	No
S. bicolor	Sb07g006300	No	#N/A	] triterpene (cycloartenol)	No
S. bicolor	Sb07g007030	No	Yes	] triterpene (cycloartenol)	No
S. bicolor	Sb07g020980	No	#N/A	core TPS	No
S. bicolor	Sb07g025240	No	#N/A	(specialized) Mevalonic acid pathway	No
S. bicolor	Sb07g025700	No	#N/A	core TPS	No
S. bicolor	Sb07g027480	No	Yes	(specialized) Mevalonic acid pathway	No
S. bicolor	Sb08g019300	Yes	Yes	] triterpene (cycloartenol)	No
S. bicolor	Sb08g019310	Yes	#N/A	] triterpene (cycloartenol)	No
S. bicolor	Sb08g021260	No	#N/A	] triterpene (cycloartenol)	No
S. bicolor	Sb08g023050	No	#N/A	(specialized) Mevalonic acid pathway	No
S. bicolor	Sb09g000980	Yes	#N/A	core TPS	No
S. bicolor	Sb09g000990	Yes	#N/A	core TPS	No
S. bicolor	Sb09g001000	No	#N/A	core TPS	No
S. bicolor	Sb09g020140	No	#N/A	(specialized) MEP pathway	Yes
S. bicolor	Sb09g020370	No	#N/A	(specialized) IPP Isomerase	No
S. bicolor	Sb09g027190	No	Yes	(specialized) Prenyltransferase	No
S. bicolor	Sb10g000450	No	#N/A	] triterpene (squalene)	No
S. bicolor	Sb10g002960	No	#N/A	(specialized) MEP pathway	Yes
S. bicolor	Sb10g027240	No	#N/A	(specialized) Prenyltransferase	No
S. bicolor	Sb10g029175	Yes	Yes	] triterpene (cycloartenol)	No
S. lycopersicum	Solyc00g154480.1	No	#N/A	core TPS	No
S. lycopersicum	Solyc01g009010.2	No	#N/A	(specialized) MEP pathway	No
S. lycopersicum	Solyc01g067890.2	No	#N/A	(specialized) MEP pathway	Yes
S. lycopersicum	Solyc01g098840.2	No	#N/A	(specialized) Mevalonic acid pathway	No
S. lycopersicum	Solyc01g101170.2	Yes	#N/A	core TPS	No
S. lycopersicum	Solyc01g101180.2	Yes	#N/A	core TPS	No
S. lycopersicum	Solyc01g101190.2	Yes	#N/A	core TPS	No
S. lycopersicum	Solyc01g101210.2	Yes	#N/A	core TPS	No
S. lycopersicum	Solyc01g101220.1	Yes	#N/A	core TPS	No
S. lycopersicum	Solyc01g102820.2	No	#N/A	(specialized) MEP pathway	No
S. lycopersicum	Solyc01g105850.2	Yes	#N/A	core TPS	No
S. lycopersicum	Solyc01g105860.2	Yes	#N/A	core TPS	No
S. lycopersicum	Solyc01g105870.2	Yes	#N/A	core TPS	No
S. lycopersicum	Solyc01g105880.2	Yes	#N/A	core TPS	No
S. lycopersicum	Solyc01g105890.2	Yes	#N/A	core TPS	No
S. lycopersicum	Solyc01g105900.2	Yes	#N/A	core TPS	No
S. lycopersicum	Solyc01g105910.1	Yes	#N/A	core TPS	No
S. lycopersicum	Solyc01g105920.2	Yes	#N/A	core TPS	No
S. lycopersicum	Solyc01g105930.1	Yes	#N/A	core TPS	No
S. lycopersicum	Solyc01g105940.2	Yes	#N/A	core TPS	No
S. lycopersicum	Solyc01g105950.2	Yes	#N/A	core TPS	No
S. lycopersicum	Solyc01g105960.2	Yes	#N/A	core TPS	No
S. lycopersicum	Solyc01g109300.2	No	#N/A	(specialized) MEP pathway	No
S. lycopersicum	Solyc02g038740.2	No	Yes	(specialized) Mevalonic acid pathway	No
S. lycopersicum	Solyc02g079840.1	Yes	#N/A	core TPS	No
S. lycopersicum	Solyc02g079890.1	Yes	Yes	core TPS	No
S. lycopersicum	Solyc02g079910.1	Yes	#N/A	core TPS	No
S. lycopersicum	Solyc02g082260.2	No	Yes	(specialized) Mevalonic acid pathway	No
S. lycopersicum	Solyc02g085700.1	Yes	#N/A	(specialized) Prenyltransferase	No
S. lycopersicum	Solyc02g085710.2	Yes	#N/A	(specialized) Prenyltransferase	No
S. lycopersicum	Solyc02g085720.1	Yes	#N/A	(specialized) Prenyltransferase	No
S. lycopersicum	Solyc03g006550.2	No	#N/A	core TPS	No
S. lycopersicum	Solyc03g007730.1	No	#N/A	core TPS	No
S. lycopersicum	Solyc03g032010.2	Yes	Yes	(specialized) Mevalonic acid pathway	No
S. lycopersicum	Solyc03g032020.2	Yes	#N/A	(specialized) Mevalonic acid pathway	No
S. lycopersicum	Solyc03g114340.2	No	#N/A	(specialized) MEP pathway	No
S. lycopersicum	Solyc04g009650.2	No	#N/A	(specialized) Mevalonic acid pathway	No
S. lycopersicum	Solyc04g015100.2	No	#N/A	(specialized) Mevalonic acid pathway	No
S. lycopersicum	Solyc04g050670.1	No	#N/A	] triterpene (cycloartenol)	No
S. lycopersicum	Solyc04g051620.1	No	#N/A	core TPS	No
S. lycopersicum	Solyc04g054380.1	No	#N/A	core TPS	No
S. lycopersicum	Solyc04g056390.2	No	#N/A	(specialized) IPP Isomerase	No
S. lycopersicum	Solyc04g070980.2	No	#N/A	] triterpene (cycloartenol)	No
S. lycopersicum	Solyc04g079960.1	No	#N/A	(specialized) Prenyltransferase	No
S. lycopersicum	Solyc05g017760.2	No	#N/A	(specialized) Mevalonic acid pathway	No
S. lycopersicum	Solyc05g026590.1	Yes	#N/A	core TPS	No
S. lycopersicum	Solyc05g026600.2	Yes	#N/A	core TPS	No
S. lycopersicum	Solyc05g047580.2	No	#N/A	] triterpene (cycloartenol)	No
S. lycopersicum	Solyc05g055760.2	Yes	#N/A	(specialized) IPP Isomerase	No
S. lycopersicum	Solyc06g059910.2	Yes	#N/A	core TPS	No
S. lycopersicum	Solyc06g059930.2	Yes	Yes	core TPS	No
S. lycopersicum	Solyc06g060010.2	Yes	#N/A	core TPS	No
S. lycopersicum	Solyc06g060180.1	Yes	#N/A	core TPS	No
S. lycopersicum	Solyc06g066310.2	No	#N/A	(specialized) Mevalonic acid pathway	No
S. lycopersicum	Solyc06g084240.1	No	Yes	core TPS	No
S. lycopersicum	Solyc07g008680.2	Yes	#N/A	core TPS	No
S. lycopersicum	Solyc07g008690.2	Yes	Yes	core TPS	No
S. lycopersicum	Solyc07g042630.2.1	No	#N/A	] triterpene (cycloartenol)	No
S. lycopersicum	Solyc07g045350.2	No	#N/A	(specialized) Mevalonic acid pathway	No
S. lycopersicum	Solyc07g051940.2	Yes	#N/A	core TPS	No
S. lycopersicum	Solyc07g052120.2	Yes	#N/A	core TPS	No
S. lycopersicum	Solyc07g052140.2	Yes	#N/A	core TPS	No
S. lycopersicum	Solyc07g066670.2	No	Yes	core TPS	No
S. lycopersicum	Solyc08g005640.2	Yes	#N/A	core TPS	No
S. lycopersicum	Solyc08g005670.2	Yes	#N/A	core TPS	No
S. lycopersicum	Solyc08g005710.2	Yes	#N/A	core TPS	No
S. lycopersicum	Solyc08g005720.2	Yes	#N/A	core TPS	No
S. lycopersicum	Solyc08g007440.1	No	#N/A	] triterpene (squalene)	No
S. lycopersicum	Solyc08g007790.2	No	Yes	(specialized) Mevalonic acid pathway	No
S. lycopersicum	Solyc08g023470.2	No	#N/A	(specialized) Prenyltransferase	No
S. lycopersicum	Solyc08g066950.2	No	#N/A	(specialized) MEP pathway	Yes
S. lycopersicum	Solyc08g076140.2	No	#N/A	(specialized) Mevalonic acid pathway	No
S. lycopersicum	Solyc08g080170.2	No	Yes	(specialized) Mevalonic acid pathway	No
S. lycopersicum	Solyc08g081570.2	No	#N/A	(specialized) MEP pathway	No
S. lycopersicum	Solyc09g008920.2	No	#N/A	(specialized) Prenyltransferase	No
S. lycopersicum	Solyc09g065230.1	No	Yes	core TPS	No
S. lycopersicum	Solyc09g092470.2	No	#N/A	core TPS	No
S. lycopersicum	Solyc10g005390.2	Yes	#N/A	core TPS	No
S. lycopersicum	Solyc10g005410.2	Yes	Yes	core TPS	No
S. lycopersicum	Solyc10g005420.1	Yes	#N/A	core TPS	No
S. lycopersicum	Solyc10g005810.2	Yes	#N/A	(specialized) Prenyltransferase	No
S. lycopersicum	Solyc10g005820.1	Yes	#N/A	(specialized) Prenyltransferase	No
S. lycopersicum	Solyc10g005840.2	Yes	#N/A	(specialized) Prenyltransferase	No
S. lycopersicum	Solyc11g007020.1	No	#N/A	(specialized) Mevalonic acid pathway	No
S. lycopersicum	Solyc11g010850.1	No	#N/A	(specialized) MEP pathway	Yes
S. lycopersicum	Solyc11g011240.1	No	#N/A	(specialized) Prenyltransferase	No
S. lycopersicum	Solyc11g069380.1	No	#N/A	(specialized) MEP pathway	No
S. lycopersicum	Solyc12g006510.1	Yes	#N/A	] triterpene (camelliol)	No
S. lycopersicum	Solyc12g006520.1	Yes	#N/A	] triterpene (camelliol)	No
S. lycopersicum	Solyc12g006530.1	Yes	#N/A	] triterpene (camelliol)	No
S. lycopersicum	Solyc12g006570.1	Yes	#N/A	core TPS	No
S. lycopersicum	Solyc12g015860.1	No	#N/A	(specialized) Prenyltransferase	No
S. lycopersicum	Solyc12g019240.1	No	#N/A	core TPS	No
S. lycopersicum	Solyc12g035440.1	Yes	#N/A	] triterpene (camelliol)	No
S. lycopersicum	Solyc12g035450.1	Yes	#N/A	] triterpene (camelliol)	No
S. lycopersicum	Solyc12g035460.1	Yes	#N/A	] triterpene (camelliol)	No
S. lycopersicum	Solyc12g056450.1	No	#N/A	(specialized) Mevalonic acid pathway	No
T. hasslerania	Th2v00751	Yes	#N/A	core TPS	No
T. hasslerania	Th2v00752	Yes	Yes	core TPS	No
T. hasslerania	Th2v00904	No	#N/A	(specialized) Prenyltransferase	No
T. hasslerania	Th2v01019	No	Yes	] triterpene (camelliol)	No
T. hasslerania	Th2v01378	No	Yes	(specialized) Prenyltransferase	No
T. hasslerania	Th2v01462	No	Yes	(specialized) Mevalonic acid pathway	No
T. hasslerania	Th2v02410	Yes	Yes	(specialized) Prenyltransferase	No
T. hasslerania	Th2v02411	Yes	#N/A	(specialized) Prenyltransferase	No
T. hasslerania	Th2v02542	No	#N/A	(specialized) MEP pathway	No
T. hasslerania	Th2v02924	No	Yes	(specialized) Mevalonic acid pathway	No
T. hasslerania	Th2v03053	No	Yes	(specialized) Prenyltransferase	No
T. hasslerania	Th2v04115	No	#N/A	(specialized) Mevalonic acid pathway	No
T. hasslerania	Th2v04510	No	Yes	(specialized) Mevalonic acid pathway	No
T. hasslerania	Th2v04903	No	Yes	] triterpene (squalene)	No
T. hasslerania	Th2v04950	Yes	#N/A	core TPS	No
T. hasslerania	Th2v04952	Yes	Yes	core TPS	No
T. hasslerania	Th2v04970	No	#N/A	core TPS	No
T. hasslerania	Th2v05137	Yes	#N/A	core TPS	No
T. hasslerania	Th2v05138	Yes	Yes	core TPS	No
T. hasslerania	Th2v05667	No	Yes	] triterpene (camelliol)	No
T. hasslerania	Th2v05855	No	Yes	core TPS	No
T. hasslerania	Th2v06059	No	Yes	(specialized) MEP pathway	No
T. hasslerania	Th2v06622	No	Yes	(specialized) Mevalonic acid pathway	No
T. hasslerania	Th2v08642	Yes	#N/A	core TPS	No
T. hasslerania	Th2v08644	Yes	#N/A	core TPS	No
T. hasslerania	Th2v08645	Yes	#N/A	core TPS	No
T. hasslerania	Th2v09798	No	#N/A	(specialized) Mevalonic acid pathway	No
T. hasslerania	Th2v10091	No	Yes	] triterpene (camelliol)	No
T. hasslerania	Th2v10128	No	Yes	core TPS	No
T. hasslerania	Th2v10411	No	#N/A	(specialized) Prenyltransferase	No
T. hasslerania	Th2v10605	Yes	Yes	(specialized) Prenyltransferase	No
T. hasslerania	Th2v10608	Yes	#N/A	(specialized) Mevalonic acid pathway	No
T. hasslerania	Th2v11008	No	#N/A	core TPS	No
T. hasslerania	Th2v11505	No	#N/A	(specialized) Mevalonic acid pathway	No
T. hasslerania	Th2v12068	No	#N/A	(specialized) MEP pathway	No
T. hasslerania	Th2v12158	No	Yes	(specialized) Mevalonic acid pathway	No
T. hasslerania	Th2v12266	No	Yes	(specialized) Prenyltransferase	No
T. hasslerania	Th2v14083	No	#N/A	] triterpene (cycloartenol)	No
T. hasslerania	Th2v14767	No	Yes	(specialized) MEP pathway	No
T. hasslerania	Th2v15321	No	Yes	(specialized) Mevalonic acid pathway	No
T. hasslerania	Th2v16249	No	#N/A	core TPS	No
T. hasslerania	Th2v16754	No	Yes	(specialized) Mevalonic acid pathway	No
T. hasslerania	Th2v17108	No	Yes	(specialized) Prenyltransferase	No
T. hasslerania	Th2v17335	No	Yes	core TPS	No
T. hasslerania	Th2v17645	Yes	#N/A	(specialized) MEP pathway	Yes
T. hasslerania	Th2v17646	Yes	#N/A	(specialized) MEP pathway	Yes
T. hasslerania	Th2v18023	No	#N/A	] triterpene (lanosterol)	No
T. hasslerania	Th2v18234	No	Yes	] triterpene (baruol)	Yes
T. hasslerania	Th2v18464	No	#N/A	(specialized) Mevalonic acid pathway	No
T. hasslerania	Th2v18600	No	Yes	(specialized) IPP Isomerase	No
T. hasslerania	Th2v18846	No	#N/A	(specialized) MEP pathway	No
T. hasslerania	Th2v19177	No	#N/A	core TPS	No
T. hasslerania	Th2v19767	No	#N/A	] triterpene (camelliol)	No
T. hasslerania	Th2v20363	No	#N/A	core TPS	No
T. hasslerania	Th2v20486	No	Yes	(specialized) MEP pathway	No
T. hasslerania	Th2v20547	No	Yes	(specialized) Mevalonic acid pathway	No
T. hasslerania	Th2v20577	No	#N/A	] triterpene (squalene)	No
T. hasslerania	Th2v20645	Yes	#N/A	core TPS	No
T. hasslerania	Th2v20646	Yes	Yes	core TPS	No
T. hasslerania	Th2v20744	No	#N/A	core TPS	No
T. hasslerania	Th2v20955	No	Yes	core TPS	No
T. hasslerania	Th2v21213	No	#N/A	] triterpene (camelliol)	No
T. hasslerania	Th2v21630	Yes	#N/A	(specialized) Prenyltransferase	No
T. hasslerania	Th2v21635	Yes	#N/A	(specialized) Prenyltransferase	No
T. hasslerania	Th2v21802	Yes	#N/A	core TPS	No
T. hasslerania	Th2v21803	Yes	#N/A	core TPS	No
T. hasslerania	Th2v21866	No	#N/A	] triterpene (camelliol)	No
T. hasslerania	Th2v23007	No	Yes	(specialized) IPP Isomerase	No
T. hasslerania	Th2v23317	Yes	#N/A	] triterpene (camelliol)	No
T. hasslerania	Th2v23318	Yes	#N/A	] triterpene (camelliol)	No
T. hasslerania	Th2v23319	Yes	Yes	] triterpene (camelliol)	No
T. hasslerania	Th2v23320	Yes	#N/A	] triterpene (camelliol)	No
T. hasslerania	Th2v23599	No	Yes	] triterpene (camelliol)	No
T. hasslerania	Th2v23914	Yes	#N/A	core TPS	No
T. hasslerania	Th2v23915	Yes	#N/A	core TPS	No
T. hasslerania	Th2v23918	Yes	Yes	core TPS	No
T. hasslerania	Th2v23919	Yes	#N/A	core TPS	No
T. hasslerania	Th2v23985	No	#N/A	(specialized) MEP pathway	No
T. hasslerania	Th2v24410	No	#N/A	core TPS	No
T. hasslerania	Th2v24447	No	#N/A	core TPS	No
T. hasslerania	Th2v24463	No	#N/A	(specialized) MEP pathway	No
T. hasslerania	Th2v25172	No	#N/A	] triterpene (lanosterol)	No
T. hasslerania	Th2v25487	No	Yes	] triterpene (baruol)	Yes
T. hasslerania	Th2v26018	Yes	#N/A	core TPS	No
T. hasslerania	Th2v26019	Yes	#N/A	core TPS	No
T. hasslerania	Th2v26061	No	#N/A	(specialized) Prenyltransferase	No
T. hasslerania	Th2v26234	No	Yes	] triterpene (baruol)	Yes
T. hasslerania	Th2v26596	Yes	Yes	(specialized) Prenyltransferase	No
T. hasslerania	Th2v26597	Yes	#N/A	(specialized) Prenyltransferase	No
T. hasslerania	Th2v26598	Yes	#N/A	(specialized) Prenyltransferase	No
T. hasslerania	Th2v27788	No	Yes	(specialized) Mevalonic acid pathway	No
T. hasslerania	Th2v28670	No	#N/A	(specialized) MEP pathway	No
T. hasslerania	Th2v30291	No	#N/A	(specialized) Mevalonic acid pathway	No
T. hasslerania	Th2v30702	No	#N/A	] triterpene (camelliol)	No
T. hasslerania	Th2v30831	No	#N/A	core TPS	No
T. hasslerania	Th2v31554	Yes	#N/A	core TPS	No
T. hasslerania	Th2v31556	Yes	#N/A	core TPS	No
