# Supplementary material for: Large-Scale Evolutionary Analysis of Genes and Supergene Clusters from Terpenoid Modular Pathways Provides Insights into Metabolic Diversification in Flowering Plants
Source: PLoS One. 2015 Jun 5;10(6):e0128808. doi: 10.1371/journal.pone.0128808 (PMC4457800; doi:10.1371/journal.pone.0128808)
Supplement: S3 Table — Numbers are quotients of the module-wise gene count of terpenoid biosynthetic pathways and the number of all protein-coding genes within the whole genome. Species with highest and lowest relative pathway size among all analyzed species are color-coded as indicated in the legend. (XLS) [file pone.0128808.s003.xls]

## Sheet: Supplementary_Table_3_revised
Supplemetary Table 3 | Species-specific relative size of terpenoid biosynthetic modules. Numbers are quotients of the module-wise gene count of terpenoid biosynthesic pathways and the number of all protein-coding genes within the whole genome. Species with highest and lowest relative pathway size among all analyzed species are color-coded as indicated in the legend.
Species	Genes in module	core-TPS	MEP pathway	MVA pathway	IPP isomerases	Prenyltransferases	Triterpene syntases
A. thaliana	0.00310038	0.0011672	0.0002918	0.000328275	7.29501e-05	0.000547126	0.000693026
B. rapa	0.00247727	0.000966136	0.000322045	0.000371591	9.90908e-05	0.000470681	0.000247727
T. hasslerania	0.00307156	0.00107663	0.000348322	0.000474984	6.33312e-05	0.000474984	0.000633312
C. gynandra	0.00321124	0.00080281	0.000401405	0.000635558	6.69008e-05	0.000568657	0.000735909
C. papaya	0.00223078	0.000899507	0.000287842	0.000323823	3.59803e-05	0.000215882	0.000467744
C. sinensis	0.00464951	0.00256117	0.000472832	0.000354624	3.94027e-05	0.000472832	0.00074865
E. grandis	0.00448098	0.0026391	0.000302397	0.00043985	5.49813e-05	0.000274907	0.000769738
G. max	0.00210429	0.00057222	0.000461467	0.000479926	3.69174e-05	0.00027688	0.00027688
C. sativa	0.00345813	0.00150353	0.000390919	0.000360848	9.0212e-05	0.000180424	0.000932191
V. vinifera	0.00814135	0.00415728	0.000606271	0.000866101	4.3305e-05	0.000216525	0.00225186
N. benthamiana	0.00210791	0.000995038	0.00030113	0.000340408	5.23704e-05	0.000235667	0.000183296
S. lycopersicum	0.00279322	0.00141101	0.000259164	0.000431941	5.75921e-05	0.000316756	0.000316756
S. tuberosum	0.0032282	0.00189593	0.000230586	0.000614896	5.12413e-05	0.000230586	0.000204965
L. sativa	0.00252347	0.000927747	0.000315434	0.000482428	9.27747e-05	0.000166994	0.000538093
S. bicolor	0.00344116	0.00144891	0.000362227	0.00039845	7.24454e-05	0.000253559	0.000905567
Z. mays	0.0025469	0.000907807	0.000327819	0.000504337	7.56506e-05	0.000252169	0.00047912
A. trichopoda	0.00186247	0.000856738	0.000409744	0.000223497	3.72495e-05	0.000223497	0.000111748
		Most extensive inventory (relative) compared to genome size
		Leanest inventory (relative) compared to genome size
